1 **A lipid-free and insulin-supplemented medium**  
2 **supports *de novo* fatty acid synthesis gene activation**  
3 **in melanoma cells**

4

5 Su Wu<sup>1,2,#a,\*</sup> and Anders M. Näär<sup>1,2,#b,\*</sup>

6

7 <sup>1</sup> Massachusetts General Hospital Center for Cancer Research, Charlestown,  
8 Massachusetts, United States of America

9 <sup>2</sup> Department of Cell Biology, Harvard Medical School, Boston, Massachusetts,  
10 United States of America

11 <sup>#a</sup> Current Address: Department of Biological Chemistry and Molecular  
12 Pharmacology, Harvard Medical School, Boston, Massachusetts, United States of  
13 America

14 <sup>#b</sup> Current Address: Department of Nutritional Sciences & Toxicology, University of  
15 California, Berkeley, California, United States of America

16

17 \* Corresponding authors

18 E-mail: [Su\\_Wu@hms.harvard.edu](mailto:Su_Wu@hms.harvard.edu) (SW) and [naar@berkeley.edu](mailto:naar@berkeley.edu) (AMN)

19

## 20 **Abstract**

21           While investigating the role played by *de novo* lipid (DNL) biosynthesis in  
22 cancer cells, we sought a medium condition that would support cell proliferation  
23 without providing any serum lipids. Here we report that a defined serum free cell  
24 culture medium condition containing insulin, transferrin and selenium (ITS) supports  
25 controlled study of transcriptional regulation of *de novo* fatty acid (DNFA) production  
26 and *de novo* cholesterol synthesis (DNCS) in melanoma cell lines. This lipid-free ITS  
27 medium is able to support continuous proliferation of several melanoma cell lines that  
28 utilize DNL to support their lipid requirements. We show that the ITS medium  
29 stimulates gene transcription in support of both DNFA and DNCS, specifically  
30 mediated by SREBP1/2 in melanoma cells. We further found that the ITS medium  
31 promoted SREBP1 nuclear localization and occupancy on DNFA gene promoters.  
32 Our data show clear utility of this serum and lipid-free medium for melanoma cancer  
33 cell culture and lipid-related areas of investigation.

## 34 **Introduction**

35 *de novo* lipid (DNL) synthesis is the metabolic pathway that converts  
36 carbohydrates into fatty acids, cholesterol, phospholipids, triglycerides, and other  
37 cellular lipids required for normal cellular homeostasis and proliferation/growth. In  
38 healthy adults, DNL is for the most part restricted to liver and adipose tissues for  
39 energy storage or distribution to other tissues. Many malignant cancer cells also  
40 exhibit elevated DNL as a hallmark adaptation to support proliferation and survival (1,  
41 2). Among the DNL pathways, *de novo* fatty acid (DNFA) biosynthesis is of  
42 particular interest as a potential therapeutic target for cancers (3, 4). DNFA is  
43 primarily regulated at the mRNA level of catalytic enzymes that drive the biosynthetic  
44 reactions (5), a transcriptional process under the control of the sterol regulatory  
45 element-binding protein 1 (SREBP1) (6). However, DNFA gene regulation is still not  
46 fully understood at the molecular level. Cell culture studies of DNFA with widely-  
47 accepted serum-containing medium conditions are often confounded by the presence  
48 of external lipids, with consequent difficulty to disentangle the respective effects of  
49 lipid synthesis and lipid uptake, both of which may occur even among cells that are  
50 able to survive and proliferate using DNFA alone (6, 7).

51 Most cell culture media are composed of serum supplements and basal media  
52 (BMs), each of which may contain confounding factors for DNFA studies. Serum  
53 typically contains external lipids in two forms: non-esterified free fatty acids (FFAs)  
54 associated with albumin, and lipoproteins that carry triglycerides, cholesterol and  
55 phospholipids encapsulated by apoproteins (8, 9). Cells can take up FFAs *via* physical  
56 diffusion across the cellular membrane (10) or *via* active transport aided by  
57 membrane-associated protein CD36 or FATPs (11). Lipoprotein uptake occurs  
58 through binding to cell surface receptors (e.g. LDL receptor; LDLR) and the bound

59 lipoprotein/receptor complex then undergoes endocytosis, intracellular/lysosomal  
60 release of the cargo and receptor recycling to the plasma membrane (12). After  
61 transport into cells, both FFAs and lipoprotein lipids are potent DNFA inhibitors in a  
62 classic negative feedback manner (13). Intracellular cholesterol interferes with  
63 trafficking of SREBP1 from the ER to the Golgi apparatus – an essential step in post-  
64 translational processing and maturation of SREBP1 – and consequently inhibits  
65 DNFA enzyme expression (6). Polyunsaturated FAs (PUFAs) have also been  
66 observed to inhibit both SREBP1 mRNA transcription and protein maturation,  
67 resulting in decreased expression of DNFA enzyme genes (14-16). DNFA expression  
68 studies have often employed lipoprotein-deficient serum (LPDS) to limit negative  
69 feedback by serum lipids. LPDS is free of lipoproteins, which are removed by  
70 ultracentrifugation, yet retains FFAs – which are confounding for DNFA studies (17).  
71 An alternative is delipidated serum (7), although that is prepared by organic solvent  
72 extraction and is not completely lipid-free (18). Preparation protocols vary widely in  
73 organic solvent composition and extraction time, and quality variation between  
74 batches is common (19, 20).

75 Basal media (BM) often contain glucose, which besides its bioenergetic role as  
76 fuel for ATP synthesis also serves as a carbon source for biosynthesis of amino acids,  
77 nucleotides, other carbohydrates, and lipids. Two of the most common BMs for  
78 cancer cell culture are Roswell Park Memorial Institute (RPMI) 1640 medium (21),  
79 with 11.11 mM glucose concentration (normal glucose level); and Dulbecco's  
80 modified Eagle's medium (DMEM), which contains 25 mM glucose (high glucose  
81 level). In cultured hepatocytes and adipocytes, high glucose conditions stimulate  
82 lipogenesis and DNFA gene expression (22, 23). Healthy livers employ glucose for  
83 DNFA principally by glycolytic citrate generation and the tricarboxylic acid (TCA)

84 cycle with oxidative phosphorylation (24, 25). Glycolysis produces pyruvate that  
85 mitochondria metabolize into citrate and ATP in the TCA cycle. The citrate then  
86 translocates to cytosol where it is cleaved by ATP-citrate lyase (ACLY) to produce  
87 acetyl-CoA as a substrate for DNFA (26-28). In contrast to healthy livers, tumors  
88 display enhanced glycolytic activity but impaired oxidative phosphorylation. Pyruvate  
89 is often metabolized to lactate within the cytoplasm of cancer cells preferentially to  
90 the TCA cycle (Warburg effect) (29). Furthermore, elevated glucose stimulates  
91 glycolysis and inhibits aerobic respiration in tumors (Crabtree effect) (30). Thus,  
92 high-glucose BMs promote conversion of glucose to pyruvate and NADH generation  
93 but inhibit production of substrates for DNFA via the TCA cycle (31, 32). In general,  
94 the glucose content of DMEM may distort normal cellular behavior and thus render it  
95 unsuitable for molecular study of DNFA transcription regulation. Both aerobic  
96 respiration and anaerobic glycolysis contribute to glucose catabolism in cancer cells  
97 cultured with RPMI-1640 medium (33). Therefore, between the two common BMs,  
98 RPMI-1640 seems preferable for lipogenesis-related investigations of cancer cells.

99       The commercially available insulin, transferrin, and selenium (ITS)  
100 supplement is a serum replacement, supporting cell survival and growth but  
101 containing no lipids. ITS supplement has been used for *in vitro* culture of  
102 mesenchymal stem cells isolated from adipose or cartilage tissues, to maintain their  
103 differentiation and proliferation capacities for tissue transplantation (34, 35). Insulin is  
104 a growth factor with a mitogenic effect in cell culture that promotes the uptake of  
105 glucose and amino acids (36, 37). In livers, insulin stimulates *SREBF1c* mRNA  
106 expression (22) as well as proteolytic maturation of the nuclear SREBP1c protein to  
107 stimulate DNFA gene expression (22, 38). Transferrin is a glycoprotein that transports  
108 Fe<sup>3+</sup> in blood plasma and delivers Fe<sup>3+</sup> to cells through binding to transferrin receptor

109 on cell surface (39).  $\text{Fe}^{3+}$  is an essential component of heme-containing enzymes like  
110 cytochromes for oxidative phosphorylation process and various non-heme iron  
111 enzymes, such as ribonucleotide reductase for DNA synthesis (40). Transferrin  
112 provides  $\text{Fe}^{3+}$  necessary to support cell survival and proliferation in culture (41).  
113 Selenium is required for proper function of antioxidant enzymes, including  
114 glutathione peroxidase and thioredoxin reductase, in which selenocysteine is  
115 indispensable for their catalytic activities (42). Components of ITS have been  
116 individually assembled in various serum-free media to support cell growth in cancer  
117 studies (43), but reports relevant to lipid metabolism are missing. Here, we introduce  
118 the combination of RPMI-1640 and ITS (ITS medium) as a straightforward serum-  
119 free medium condition for activating DNFA gene expression in melanoma cancer cell  
120 culture. The ITS medium stimulates cell growth, exhibits consistent effect across  
121 batches, and is free of confounding lipid factors. We expect that it may be adopted for  
122 investigations in lipid metabolism in cell lines from different cancer types and should  
123 facilitate *in vitro* screening for DNFA pathway inhibitors.

124

## 125 **Materials and Methods**

### 126 **Cell culture reagent**

127 The melanoma cell lines were obtained from the MGH Center for Molecular  
128 Therapeutics. Four melanoma cell lines from different stages of melanoma  
129 progression were used for these studies. MEL-JUSO is derived from a primary  
130 cutaneous melanoma (pre-metastatic) tumor (44, 45), WM1552C cell line is derived  
131 from a primary melanoma tumor with vertical growth phase in the patient (46, 47),  
132 HT-144 is a malignant melanoma cell line derived from a metastatic site (48, 49), and

133 A375 is derived from a malignant melanoma tumor with highly metastatic amelanotic  
134 feature (50, 51). Cell lines were cultured in RPMI-1640 medium (21870092, Thermo  
135 Fisher Scientific) with 10% fetal bovine serum (Gibco), 2 mM L-glutamine (Gibco)  
136 and 50 U/ml penicillin-streptomycin (Gibco) in a 37 °C incubator with 5% CO<sub>2</sub>. The  
137 0% FBS medium contained RPMI-1640 medium, with 2 mM L-glutamine (Gibco)  
138 and 50 U/ml penicillin-streptomycin (Gibco). The 1% ITS medium contained the  
139 RPMI-1640 medium with 1 × Insulin-Transferrin-Selenium (ITS-G, Thermo Fisher  
140 Scientific), 2 mM L-glutamine (Gibco) and 50 U/ml penicillin-streptomycin (Gibco).

141

142 **Long-term culture in 1% ITS medium:** HT-144, A375, and WM1552C  
143 cells were maintained in 25 cm<sup>2</sup> flasks in 1% ITS medium. When melanoma cells  
144 were approximately 80% confluent, they were rinsed with sterile PBS solution and  
145 then detached with 0.5 mL trypsin solution (0.25%). The equivalent of 5 volumes of  
146 pre-warmed plating medium (mixture of 1% ITS and 10% FBS media in 9: 1 ratio)  
147 was added in order to inactivate trypsin. Cell suspension was pipetted into new flasks  
148 at 1:6 split ratio and then topped up with plating medium. Newly passaged cells were  
149 left at 37°C for 1.5 hours to recover and settle on flask. Then the plating medium was  
150 removed and changed to 1% ITS medium to remove any residual trypsin and FBS for  
151 continuous culture. HT-144 and A375 cells were passaged in 1% ITS medium every  
152 5-7 days, whereas WM1552C cells were passaged in 1% ITS medium approximately  
153 every 10 days.

154

## 155 **Cell proliferation assays**

156 **AlamarBlue assay:** Cells were seeded in 24-well plates (Corning) in RPMI-  
157 1640 medium with 10% FBS at a density of 2,000 cells per well for HT-144, MEL-

158 JUSO and WM1552C, and 1,000 cells per well for A375, Sixteen hours after seeding,  
159 cells were washed twice with PBS buffer and then cultured in three different medium  
160 conditions for 6 days. Relative cell viability was quantified for cellular metabolic  
161 activities by alamarBlue cell viability reagent (DAL1025, Thermo Fisher Scientific).  
162 Fluorescence emission of reduced resorufin was measured at 590 nm wavelength  
163 using an Envision 2103 multilabel microplate reader (Perkin Elmer). Each data point  
164 represents average measurement from four replicate samples with duplicate  
165 measurement. Because the culture medium influences resazurin fluorescence, the  
166 background fluorescence of medium-only with alamarBlue reagent was subtracted for  
167 data normalization.

168

169 **CyQuant assay:** Cells were seeded in 96-well plates (Corning, 3610) in  
170 RPMI-1640 medium with 10% FBS at a density of 1,000 cells per well for HT-144,  
171 MEL-JUSO and WM1552, and 500 cells per well for A375. Sixteen hours after  
172 seeding, cells were then cultured in three different medium conditions for six days.  
173 Relative live cell numbers were quantified based on DNA content and membrane  
174 integrity with CyQuant direct cell proliferation assay (C35011, Thermo Fisher  
175 Scientific). Green fluorescent nucleic acid stain signal was measured with FITC filter  
176 set on the Envision 2103 multilabel microplate reader (Perkin Elmer). The  
177 background fluorescence of medium-only with CyQuant reagent was subtracted for  
178 data normalization.

179

## 180 **Reverse transcription quantitative PCR (RT-qPCR)**

181 Total RNA was isolated from cultured cells using the RNeasy mini kit (Qiagen)  
182 and treated with RNase-free DNase (Qiagen). RNA concentrations were quantified



183 with Qubit™ RNA BR assay kit (Thermo Fisher Scientific). One µg RNA was used  
184 for cDNA synthesis with RNA to cDNA EcoDry™ premix (TaKaRa) containing both  
185 random hexamer and oligo(dT)18 primers (Double Primed). qPCR was carried out in  
186 triplicates on a LightCycler® 480 instrument (Roche) using LightCycler® 480 SYBR  
187 green I master (Roche). qPCR primers were pre-designed by MGH primer bank  
188 (<https://pga.mgh.harvard.edu/primerbank/>) and the primer sequences are listed in  
189 Table 1. Relative gene expression levels were calculated using the  $2^{-\Delta\Delta Ct}$  method,  
190 normalized to the 18S housekeeping gene, and the mean of negative control samples  
191 was set to 1.

192

193 **Table 1. Primers used for RT-qPCR.**

|                       |                                   |
|-----------------------|-----------------------------------|
| <i>ACACA</i> forward  | 5' – ATGTCTGGCTTGACCTAGTA – 3'    |
| <i>ACACA</i> reverse  | 5' – CCCCAAAGCGAGTAACAAATTCT – 3' |
| <i>ACLY</i> forward   | 5' – TCGGCCAAGGCAATTTTCAGAG – 3'  |
| <i>ACLY</i> reverse   | 5' – CGAGCATACTTGAACCGATTCT – 3'  |
| <i>ACSS2</i> forward  | 5' – AAAGGAGCAACTACCAACATCTG – 3' |
| <i>ACSS2</i> reverse  | 5' – GCTGAACTGACACACTTGGAC – 3'   |
| <i>FASN</i> forward   | 5' – AAGGACCTGTCTAGGTTTGATGC – 3' |
| <i>FASN</i> reverse   | 5' – TGGCTTCATAGGTGACTTCCA – 3'   |
| <i>SCD</i> forward    | 5' – TCTAGCTCCTATAACCACCACCA – 3' |
| <i>SCD</i> reverse    | 5' – TCGTCTCCAATTATCTCCTCC – 3'   |
| <i>ACSL1</i> forward  | 5' – CCATGAGCTGTTCCGGTATTT – 3'   |
| <i>ACSL1</i> reverse  | 5' – CCGAAGCCCATAAGCGTGTT – 3'    |
| <i>SREBF1</i> forward | 5' – ACAGTGACTTCCCTGGCCTAT – 3'   |

|                       |                                  |
|-----------------------|----------------------------------|
| <i>SREBF1</i> reverse | 5' – GCATGGACGGGTACATCTTCAA – 3' |
| <i>SREBF2</i> forward | 5' – AACGGTCATTCACCCAGGTC – 3'   |
| <i>SREBF2</i> reverse | 5' – GGCTGAAGAATAGGAGTTGCC – 3'  |
| <i>HMGCS1</i> forward | 5' – GATGTGGGAATTGTTGCCCTT – 3'  |
| <i>HMGCS1</i> reverse | 5' – ATGTCTCTGTTCCAACCTCCAG – 3' |
| <i>HMGCR</i> forward  | 5' – TGATTGACCTTCCAGAGCAAG – 3'  |
| <i>HMGCR</i> reverse  | 5' – CTAAAATTGCCATTCCACGAGC – 3' |
| <i>LDLR</i> forward   | 5' – ACCAACGAATGCTTGGACAAC – 3'  |
| <i>LDLR</i> reverse   | 5' – ACAGGCACTCGTAGCCGAT – 3'    |
| 18S forward           | 5' – GTAACCCGTTGAACCCATT – 3'    |
| 18S reverse           | 5' – CCATCCAATCGGTAGTAGCG – 3'   |

194

## 195 **siRNA transfection**

196       The human-specific siRNAs targeting *SREBF1* (6720) and *SREBF2* (6721)  
197 were pre-designed ON-TARGETplus SMARTpool siRNA reagents from Dharmacon.  
198 Each ON-TARGETplus SMARTpool siRNA was a mixture of four siRNA duplexes.  
199 siRNAs were suspended in RNase-free 1 × siRNA Buffer (Dharmacon) to yield 20  
200 μM stock solutions. HT-144 cells were transfected with siRNAs at a final  
201 concentration of 50 nM using Lipofectamine RNAiMAX transfection reagent  
202 (Thermo Fisher Scientific) at a density of  $2 \times 10^5$  cells/well in a 6-well plate. For each  
203 transfection, 2.5 μl of siRNA stock solution was mixed with 4 μl of Lipofectamine  
204 RNAiMAX in 200 μl of Opti-MEM I medium and then incubated for 10-20 minutes  
205 at room temperature. HT-144 cells were diluted in 10% FBS/RPMI-1640 medium  
206 without antibiotics so that 800 μl medium contains  $2.5 \times 10^5$  HT-144 cells. 200 μl of  
207 siRNA/Lipofectamine RNAiMAX complexes was mixed with 800 μl of the diluted

208 HT-144 cells in one well of a 6-well plate. Transfected HT-144 cells were incubated  
209 at 37°C for 16 hours before medium changes.

210

## 211 **Immunoblot assay**

212 HT-144 cells were seeded in 10 cm<sup>2</sup> plates in 10% FBS/RPMI-1640 medium  
213 at day one. Sixteen hours after seeding, cells were washed twice with PBS buffer and  
214 then cultured in different medium conditions. Total cell lysate was harvested with  
215 RIPA buffer containing protease inhibitors (protease inhibitor cocktail tablets, Roche)  
216 on the third day. Nuclear and cytoplasmic protein fractions were prepared with NE-  
217 PER™ nuclear and cytoplasmic extraction reagents (Thermo Fisher Scientific).  
218 Protein samples were separated on the 4-15% Mini-PROTEAN® TGX™ precast  
219 SDS-PAGE gels (Bio-Rad) and then transferred to polyvinyl difluoride (PVDF)  
220 membranes (Immobilon-P, Millipore) for immunoblot analysis. The following  
221 primary antibodies were used: mouse anti-SREBP1 (IgG-2A4, BD Biosciences),  
222 rabbit anti-FASN (C20G5, Cell Signaling), rabbit anti-SCD (23393-1-AP,  
223 Proteintech), rabbit anti-ACSL1 (D2H5, Cell Signaling), rabbit anti-histone H3 (9715,  
224 Cell Signaling) and rabbit anti-beta-actin (13E5, Cell Signaling). After being  
225 incubated with primary antibodies overnight in PBST solution with 5% non-fat dry  
226 milk, immunoblot membranes were probed with HRP-conjugated affinity-purified  
227 donkey anti-mouse or anti-rabbit IgG (GE Healthcare) as secondary antibodies and  
228 visualized with the immobilon Western Chemiluminescent HRP substrate (Millipore).  
229

## 230 **Chromatin immunoprecipitation (ChIP) quantitative PCR**

### 231 **(ChIP-qPCR)**

232 For each ChIP assay,  $5 \times 10^7$  HT-144 cells were used. HT-144 cells were  
233 seeded in 10% FBS medium, and then medium was replaced with 10% FBS or 1%  
234 ITS medium and cultured for 24 hours before ChIP-qPCR analyses. Chromatin from  
235 HT-144 cells was fixed with 1% formaldehyde (Polysciences) and prepared with  
236 Magna ChIP™ HiSens chromatin immunoprecipitation kit (EMD Millipore). Nuclei  
237 were sonicated on a sonic dismembrator 550 (Fisher Scientific) with a microtip  
238 (model 419) from Misonix Inc. Lysates were sonicated on ice with 10 pulses of 20  
239 seconds each (magnitude setting of 3.5) and a 40-sec rest interval. The supernatant  
240 was used for immunoprecipitation with the following antibodies: rabbit anti-SREBP1  
241 (H-160, Santa Cruz Biotechnology), rabbit anti-CBP (C-22, Santa Cruz  
242 Biotechnology), rabbit anti-RNA polymerase II (8WG16, BioLegend) and rabbit anti-  
243 histone H3 (acetyl K27) (ab4729, Abcam). qPCR reactions in triplicates were  
244 performed on a LightCycler® 480 instrument (Roche) using LightCycler® 480 SYBR  
245 green I master (Roche). The ChIP-qPCR primers were designed with software Primer  
246 3. The primer sequences are listed in Table 2.

247

248 **Table 2. Primers used for ChIP-qPCR.**

|               |                                |
|---------------|--------------------------------|
| SCD 12F (TSS) | 5' – GTGGCACCAAATTCCTTCG – 3'  |
| SCD 12R (TSS) | 5' – GACACCGACACCACACCA – 3'   |
| SCD 245F      | 5' – CTTGGCAGCGGATAAAAGGG – 3' |
| SCD 245R      | 5' – GCACGCTAGCTGGTTGTC – 3'   |

249

## 250 **Results**

### 251 **A lipid-free and insulin-supplemented (ITS) medium** 252 **supports melanoma cell proliferation**

253 To assess the utility of the 1% ITS medium for culturing melanoma cell lines  
254 and evaluating DNFA gene expression, we first performed time-course analysis to  
255 measure growth rates of melanoma cell lines under three different cell culture medium  
256 conditions: RPMI-1640 supplemented with either 10% FBS, 0% FBS, or 1% ITS.  
257 Four different melanoma cell lines were tested: HT-144, A375, WM1552C and MEL-  
258 JUSO. HT-144 and A375 were derived from human metastatic melanomas (48, 51),  
259 whereas WM1552C was derived from a stage III superficial spreading primary  
260 melanoma (47), and MEL-JUSO was derived from a primary human melanoma (52).  
261 Viable melanoma cells were quantified using alamarBlue daily for six days. We found  
262 that HT-144, A375 and WM1552C cells cultured in 10% FBS and 1% ITS medium  
263 conditions displayed a time-dependent increase of fluorescence reads in the  
264 alamarBlue assay (Fig 1A, S1A - S1B Fig). We also observed increased cell numbers  
265 with light microscopy, confirming that the cell lines proliferated in both 10% FBS and  
266 1% ITS medium conditions. We observed a growth plateau of HT-144, A375 and  
267 WM1552C cells in 0% FBS medium, which lacks growth factors such as insulin, and  
268 in which cells therefore remain quiescent. MEL-JUSO cells did not display a time-  
269 dependent increase of fluorescence reads in 0% FBS and 1% ITS medium conditions  
270 with alamarBlue assay (S1C Fig), which indicates that MEL-JUSO cells did not  
271 proliferate in these two medium conditions, possibly related to its less transformed  
272 phenotype (52).

273           The alamarBlue assay measures the fluorescence emission of resorufin  
274 molecules converted from resazurin by reductants such as NADPH or NADH (53, 54).  
275 The alamarBlue assay is thus an indicator of cellular NADPH/NADH concentration in  
276 living cells. Because cytosolic NADPH serves as the reductant for biosynthesis  
277 pathways such as lipid and nucleic acid synthesis, alamarBlue assay may provide a  
278 hint regarding DNFA activity. Therefore, we compared the alamarBlue reads of cells  
279 cultured in different medium conditions at day one, when they had the same cell  
280 numbers in the three medium conditions. HT-144 cells cultured in 1% ITS medium  
281 had the highest fluorescence reads, whereas those cultured in 10% FBS medium had  
282 the lowest reads (Fig 1B). This result suggests that even when the cell number  
283 remains the same, HT-144 cells cultured in 1% ITS possibly have higher  
284 NADPH/NADH concentrations. We observed similar increases of alamarBlue reads  
285 when culturing A375 and WM1552C cells in 1% ITS medium condition (S1D – S1E  
286 Fig), and an insignificantly small increase in MEL-JUSO cells cultured in 1% ITS  
287 medium compared to 10% FBS medium (S1F Fig).

288           To ensure that metabolic activities measured by the alamarBlue assay  
289 represent the cell proliferation rate (55), we used CyQuant, a DNA-content based  
290 assay, for confirmation. We measured the DNA content of four melanoma cell lines  
291 cultured in three different medium conditions after six days of culture. We observed  
292 that DNA contents for HT-144, A375 and WM1552C cell lines were significantly  
293 higher in 1% ITS medium than those in 0% FBS medium (Fig 1C, S1G and S1H Fig).  
294 We observed no difference in DNA content in MEL-JUSO between 1% ITS and 0%  
295 FBS medium conditions (S1I Fig), consistent with the cell proliferation results from  
296 alamarBlue assays (S1C Fig). CyQuant assay results validated the finding that A375,  
297 HT-144 and WM1552C cells proliferate in lipid-free and insulin-supplemented

298 medium. Since 1% ITS medium does not contain any external lipids, we reasoned that  
299 the lipids employed under this condition for membrane synthesis and other cellular  
300 needs during proliferation of A375, HT-144 and WM1552C cells are entirely derived  
301 from DNFA.

302 To account for the possibility that elevated DNFA acts as short-term  
303 adaptation to support cell proliferation after transfer to 1% ITS medium for culture,  
304 we investigated the four melanoma cell lines in that medium for long-term cell growth.  
305 We observed that cell lines derived from metastatic melanomas, A375 and HT-144,  
306 are able to continuously proliferate under 1% ITS medium condition and were sub-  
307 cultured by six passages over 6 weeks (Fig 1E – 1H, S2B – S2E Fig). WM1552C, a  
308 primary melanoma cell line, proliferated much more slowly in 1% ITS medium than  
309 in 10% FBS medium, but we were able to subculture this line by four passages over 6  
310 weeks (S2G – S2J Figs). We also noticed morphological changes of A375, HT-144  
311 and WM1552C cells under long-term 1% ITS medium culture. The cells changed  
312 shape from an adherent and flattened appearance in 10% FBS (Fig 1D, S2A and S2F  
313 Fig) to a rounded form at late passages in 1% ITS (Fig 1H, S2E and S2J Fig). HT-144  
314 and particularly A375 cells formed small spheroids, with some cells floating as single  
315 cells. MEL-JUSO, a primary melanoma cell line, failed to proliferate or survive  
316 passage in 1% ITS medium (S2K – S2M Fig). These results suggest that the ability to  
317 proliferate in 1% ITS medium condition varies among melanoma cell lines, largely in  
318 line with degree of progression from primary to metastatic cell state.

319

320 **Fig 1. A lipid-free and insulin-supplemented medium supports**  
321 **proliferation of HT-144 melanoma cells.**

322 (A) HT-144 cells were seeded in 10% FBS medium at day zero. On day one, cells  
323 were washed with PBS and changed to the indicated medium conditions. Cell  
324 proliferation was measured with alamarBlue assay daily for six days. Each data point  
325 represents the mean  $\pm$ SD of quadruplicate samples. The results were analyzed using  
326 two-way repeated measures ANOVA followed by *post hoc* Tukey's multiple  
327 comparison tests. For culture time,  $F = 1505$ ,  $P < 0.0001$ ; for culture condition,  $F =$   
328  $2153$ ,  $P < 0.0001$ ; for interaction between culture time and condition,  $F = 409.4$ ,  $P <$   
329  $0.0001$ . (B) HT-144 cells were seeded in 10% FBS medium at day zero. On day one,  
330 cells were washed with PBS and changed to the indicated medium conditions.  
331 alamarBlue assay was performed on the cells cultured in the indicated medium for  
332 one hour. Results were analyzed using one-way ANOVA followed by *post hoc*  
333 Tukey's multiple comparison tests.  $F = 202.7$ . Significant differences between  
334 medium conditions are indicated as \* $P < 0.05$ , \*\* $P < 0.01$ , \*\*\* $P < 0.001$  and \*\*\*\* $P <$   
335  $0.0001$ . ns, not significant. (C) HT-144 cells were seeded in 10% FBS medium at day  
336 zero. On day one, cells were washed with PBS and changed to the indicated medium  
337 conditions. CyQuant assays were performed on the cells cultured in the indicated  
338 medium at day six. Each data bar represents average measurement of five replicate  
339 samples. Results were analyzed using one-way ANOVA followed by *post hoc*  
340 Tukey's multiple comparison tests.  $F = 80.77$ ,  $P < 0.0001$ . Significant differences  
341 between medium conditions are indicated as \* $P < 0.05$ , \*\* $P < 0.01$ , \*\*\* $P < 0.001$  and  
342 \*\*\*\* $P < 0.0001$ . ns, not significant. (D - H) HT-144 cells were cultured in RPMI  
343 medium with 10% FBS or 1% ITS supplement for multiple passages. Morphologies



344 of cells cultured in 1% ITS medium from passage one (P1) to passage six (P6) were  
345 monitored by light microscopy with 40 × objective and 10 × ocular lens.

346

### 347 **ITS medium increases DNFA and DNCS gene expression in** 348 **melanoma cells**

349 To understand whether proliferation and cell survival in 1% ITS medium were  
350 linked to elevated DNFA activity, we performed RT-qPCR analyses of DNFA mRNA,  
351 including *ACLY*, *ACSS2*, *ACACA*, *FASN*, *SCD*, and *ACSL1*. We also examined the  
352 expression of *de novo* cholesterol synthesis (DNCS) genes, including *HMGCS1* and  
353 *HMGCR*. HT-144 cells were seeded in 10% FBS medium, and then medium was  
354 replaced with 0% FBS or 1% ITS medium and cultured for 24 hours before RT-qPCR  
355 analyses. We observed a significant increase in the expression of DNFA (Fig 2A-2F),  
356 DNCS (Fig 2G and 2H) and *LDLR* (Fig. 2I) genes when comparing cells cultured in 0%  
357 FBS and 1% ITS medium conditions to cells in 10% FBS medium. We observed  
358 lower DNFA and DNCS gene expression in cells cultured in 10% FBS medium than  
359 in 0% FBS medium, consistent with repression of DNFA and DNCS by lipids derived  
360 from the serum supplement.

361 Fig 1 indicates that HT-144 cells remain quiescent in 0% FBS medium and  
362 proliferate in 1% ITS. Quiescent HT-144 cells have enhanced DNFA and DNCS gene  
363 expression, even though there is no requirement for membrane lipid synthesis to  
364 support proliferation, and the reasons for this remain unclear. DNFA and DNCS gene  
365 expression is elevated in 1% ITS medium as compared with 0% FBS medium, which  
366 may suggest that the insulin component of the ITS supplement contributes to  
367 stimulation of DNFA gene expression.

368 We further observed significantly increased expression of *SREBF1* and  
369 *SREBF2* genes in cells cultured in 0% FBS and 1% ITS medium conditions,  
370 compared to 10% FBS medium (Fig 2J and 2K). These results suggest that SREBP1  
371 and SREBP2 are transcriptionally activated in lipid-free and insulin-supplemented  
372 conditions. Because SREBP1/2 can bind to sterol regulatory elements (SRE) located  
373 in their own promoters, SREBP1/2 proteins possibly regulate their mRNA production  
374 through auto-activation (56) and this mechanism may also contribute to elevated  
375 DNFA and DNCS gene expression.

376 We additionally performed gene expression analyses of DNFA and DNCS  
377 pathways in MEL-JUSO cells, which failed to proliferate in 1% ITS medium. MEL-  
378 JUSO cells were seeded in 10% FBS medium, and then medium was replaced with 0%  
379 FBS or 1% ITS medium and cultured for 24 hours before RT-qPCR analyses. We  
380 observed a significant increase in the expression of DNFA (S3A-S3F Fig), DNCS  
381 (S3G, S3H Fig) and *LDLR* (S3I Fig) genes when comparing cells cultured in 0% FBS  
382 and 1% ITS medium conditions to cells cultured in 10% FBS medium. However, the  
383 increase in expression of *SREBF1* (Fig 2E and S3E Fig) and certain DNFA genes  
384 such as *ACACA* (Fig 2C and S3C Fig) and *SCD* (Fig 2J and S3J Fig) was much lower  
385 in MEL-JUSO cells than in HT-144 cells, when comparing 1% ITS medium  
386 conditions to 10% FBS medium. These results suggest that DNFA activities can be  
387 elevated as a short-term response to lipid-free condition and insulin supplement in  
388 cells that cannot proliferate by relying upon DNFA as a sole source of lipids. We  
389 reason that the robustness and sustainability of DNFA elevation in melanoma cells  
390 probably influences proliferative capacity.

391

392 **Fig 2. Lipid depletion combined with insulin supplement yields**  
393 **increased expression of lipogenic genes in HT-144 cells.**

394 (A-K) The expression level of DNFA and DNCS genes was analyzed by RT-qPCR  
395 assay. HT-144 cells were cultured in 10%, 0% FBS or 1% ITS medium for 24 hours.  
396 Significant differences between medium conditions are indicated as \*P < 0.05, \*\*P <  
397 0.01, \*\*\*P < 0.001 and \*\*\*\*P < 0.0001 using one-way ANOVA followed by *post hoc*  
398 Tukey's multiple comparison tests. ns, not significant. Each data point represents the  
399 mean  $\pm$ SD of results from quadruplicate samples.

400

401 **ITS medium increases DNFA and DNCS gene expression via**  
402 **SREBP1 and SREBP2, respectively**

403 SREBP1 and SREBP2 are master transcription regulators of DNFA and  
404 DNCS pathways, respectively (57). To verify cellular dependence on SREBP1 and  
405 SREBP2 for lipid biosynthesis pathways, we transfected HT-144 cells with pooled  
406 siRNAs to deplete mRNAs encoding *SREBF1* and *SREBF2*. The transfected cells  
407 were cultured in 10% FBS, 0% FBS or 1% ITS medium conditions for two days and  
408 then assayed with RT-qPCR for DNFA (Fig 3) and DNCS (Fig 4) gene expression.

409 In the group treated with scrambled siRNA (blue bars in Figs 3 and 4), we  
410 found that DNFA and DNCS gene expression was significantly elevated in 0% FBS  
411 and 1% ITS medium conditions compared to 10% FBS, consistent with our  
412 observations in Fig 2. However, DNFA gene expression is significantly lower in the  
413 *SREBF1* depleted group than in the scramble siRNA group, particularly in 0% FBS  
414 and 1% ITS medium conditions (Fig 3A-3F, statistical comparisons marked in black).  
415 DNCS gene expression is significantly lower in the *SREBF2* depleted group than in

416 the scramble siRNA group, in 0% FBS and 1% ITS medium conditions (Fig 4A and  
417 4B, statistical comparisons marked in black). Two-way ANOVA analysis detects a  
418 significant interaction between *SREBF1/2* depletion and medium condition for DNFA  
419 and DNCS gene expression. This result provides a statistical indication that SREBP1  
420 and SREBP2 participate in activation of lipogenic gene expression in 0% FBS and 1%  
421 ITS conditions. We further found that *SREBF1* siRNA has the greatest effect on  
422 DNFA gene expression (Fig 3A-3F), and *SREBF2* siRNA has the greatest effect on  
423 DNCS gene expression (Fig 4A and 4B). *LDLR* appears to be regulated primarily  
424 through SREBP1 rather than SREBP2 in HT-144 cells (Fig 4C). Our results are  
425 consistent with known roles for SREBP1 and SREBP2 in activation of DNFA and  
426 DNCS gene expression (57).

427 In the scrambled siRNA treated groups, we observed significantly higher  
428 DNFA and DNCS gene expression in 1% ITS than in 0% FBS medium, suggesting  
429 additional influence of the ITS supplement on DNFA gene expression (Figs 3 and 4,  
430 statistical comparisons marked in blue). In the *SREBF1*-depleted group, we observed  
431 no significant increase of DNFA gene expression when comparing 1% ITS to 0%  
432 FBS condition (Fig 3A-3F, statistical comparisons marked in red). Similarly, in  
433 *SREBF2*-depleted group there is no significant elevated expression of DNCS genes,  
434 *HMGCS1* and *HMGCR*, in 1% ITS medium compared to 0 % FBS (Fig 4A and 4B,  
435 statistical comparisons marked in green). Altogether, these results support the utility  
436 of the 1% ITS medium condition to study SREBP1- and SREBP2-targeted  
437 interventions to inhibit DNFA and DNCS respectively, in the absence of confounding  
438 serum lipids.

439

440 **Fig 3. DNFA gene expression of HT-144 cells increases in ITS**  
441 **medium, and this increase is dependent upon SREBP1.**

442 (A-F) HT-144 cells were transfected over one day with siRNAs at 50 nM  
443 concentrations for non-target control, *SREBF1* or *SREBF2*. Transfected cells were  
444 cultured in 10%, 0% FBS or 1% ITS for two more days before RT-qPCR analyses.  
445 RT-qPCR results are presented as expression of DNFA genes relative to their  
446 expression under scramble siRNA treatment (siNegative) in 10% FBS medium (set as  
447 1 and marked with a dashed line). When a significant interaction between siRNA  
448 treatment and medium condition was detected by two-way ANOVA, individual gene  
449 expression was compared within groups by *post hoc* Tukey's multiple comparison  
450 tests. Each data point represents the mean  $\pm$ SD of triplicate samples. \*,  $P < 0.05$ ; \*\*,  $P$   
451  $< 0.01$ ; \*\*\*,  $P < 0.001$ ; \*\*\*\*,  $P < 0.0001$ .

452

453 **Fig 4. DNCS gene expression of HT-144 cells increases in ITS**  
454 **medium, and this increase is dependent upon SREBP2.**

455 (A-E) HT-144 cells were transfected over one day with siRNAs at 50 nM  
456 concentrations for non-target control, *SREBF1* or *SREBF2*. Transfected cells were  
457 cultured in 10%, 0% FBS or 1% ITS for two more days before RT-qPCR analyses.  
458 RT-qPCR results are presented as expression of genes relative to their expression  
459 under scramble siRNA treatment (siNegative) in 10% FBS medium (set as 1 and  
460 marked with a dashed line). When a significant interaction between siRNA treatment  
461 and medium condition was detected by two-way ANOVA, individual gene expression  
462 was compared within groups by *post hoc* Tukey's multiple comparison tests. Each  
463 data point

464 represents the mean  $\pm$ SD of triplicate samples. \*,  $P < 0.05$ ; \*\*,  $P < 0.01$ ; \*\*\*,  $P <$   
465 0.001; \*\*\*\*,  $P < 0.0001$ .

466

### 467 **ITS medium increases the level of nuclear SREBP1**

468 To confirm that lipid-free and/or insulin-supplemented medium conditions  
469 influence SREBP1 protein production in general and its nuclear form in particular, we  
470 examined the cytoplasmic and nuclear levels of SREBP1 in HT-144 cells cultured  
471 under the three medium conditions (Fig 5A). Our results revealed a dramatic increase  
472 of nuclear SREBP1 in 0% FBS and 1% ITS medium conditions. However, we did not  
473 observe a decrease of full-length SREBP1 in the cytoplasmic fraction from 0% FBS  
474 and 1% ITS medium conditions. The overall SREBP1 protein level increased in 0%  
475 FBS and 1% ITS medium conditions, which is likely due to transcriptional activation  
476 of the *SREBF1* gene (Fig 2J).

477 Consistent with the increased mRNA for DNFA genes (Fig 2D-2F), there is  
478 increased production of DNFA enzymes including FASN, SCD and ACSL1 in the  
479 cytoplasmic fraction from 0% FBS and 1% ITS medium conditions. The increase of  
480 DNFA enzyme production correlates with the increase of nuclear SREBP1. We  
481 interpret this as evidence that lipid depletion combined with insulin supplement  
482 greatly enhances the abundance of the SREBP1 nuclear form and thus stimulates  
483 DNFA enzyme production.

484

### 485 **Fig 5. Lipid depletion combined with insulin supplement yields** 486 **increased expression of nuclear SREBP1.**

487 (A) The cytoplasmic and nuclear fractions of HT-144 cells cultured in 10%, 0% FBS  
488 or 1% ITS medium were isolated for Western blot analysis. HT-144 cells in 1% ITS

489 medium have increased levels of nuclear SREBP1 protein and lipogenic enzymes,  
490 detected with the indicated antibodies. Histone H3 serves as the positive control for  
491 nuclear fractionation during biochemical preparation of the cell samples.

492

### 493 **Culture in ITS medium increases SREBP1 binding at the** 494 ***SCD* gene promoter**

495 Finally, we investigated medium condition impact upon the molecular  
496 mechanism by which nuclear SREBP1 controls DNFA gene expression. We used  
497 chromatin immunoprecipitation (ChIP)-qPCR to examine the occupancy of SREBP1,  
498 transcriptional co-activator CBP (58, 59), RPB1 (the largest subunit of RNA  
499 polymerase II) and histone marker H3K27Ac (a marker for active enhancers and  
500 promoters) (60) on the promoter of DNFA gene *SCD* (Fig 6A-6D). We observed a  
501 significant increase of SREBP1 and CBP binding at the *SCD* transcription start site  
502 (TSS) in 1% ITS relative to 10% FBS (Fig 6A and 6C, statistical comparisons marked  
503 in black). A corresponding slight increase of RBP1 at the *SCD* TSS site is not  
504 statistically significant, however we observe a modest but significant increase in  
505 RPB1 occupancy downstream of TSS in the gene body (Fig 6B, statistical  
506 comparisons marked in black), consistent with active RNA polymerase II elongation  
507 (61). 1% ITS does not significantly increase the H3K27Ac signal at the *SCD* TSS nor  
508 downstream in the gene body compared to 10% FBS (Fig 6D, statistical comparisons  
509 marked in black). However, we observed abundant H3K27Ac signals in the gene  
510 body for both 10% and 1% ITS (Fig 6D, statistical comparisons marked in blue and  
511 red). This result suggests that the *SCD* gene body may be constitutively active, with  
512 open chromatin architecture.

513 Two-way ANOVA analysis detects significant interactions between gene  
514 locus and medium condition in SREBP1 and RNA polymerase II ChIP-qPCR data.  
515 This result indicates that 1% ITS significantly promotes enrichment of SREBP1 at  
516 TSS region and RNA polymerase II at gene body region. We reason that, in 1% ITS  
517 medium, the likely transcription regulation mechanism after SREBP1 binding  
518 involves promotion of the transition from RNA polymerase II pausing to active  
519 elongation (61).

520

521 **Fig 6. Lipid depletion combined with insulin supplement increased**  
522 **SREBP1 binding at the *SCD* gene promoter.**

523 (A-D) ChIP-qPCR analyses for enrichment of transcriptional regulation factors on the  
524 TSS and gene body region (245 bp downstream of TSS) of the *SCD* gene locus. qPCR  
525 was used to quantify chromatin immunoprecipitated with the indicated antibodies  
526 from HT-144 cells cultured in 10% FBS or 1% ITS medium. Quantification of  
527 enrichment was determined as percentage of input chromatin before  
528 immunoprecipitation. Each data point represents the mean  $\pm$ SD of triplicate samples.  
529 Two-way ANOVA was used to identify any significant interaction between gene  
530 locus and medium condition on influencing binding of indicated factors in ChIP assay.  
531 (A) SREBP1 binding. For interaction between gene locus and medium,  $F = 86.24$ ,  $P <$   
532  $0.0001$ ; (B) RNA polymerase II binding.  $F = 6.245$ ,  $P = 0.0213$ . (C) CBP binding.  $F =$   
533  $3.848$ ,  $P = 0.0854$ . (D) H3K27Ac binding.  $F = 0.09706$ ,  $P = 0.7586$ . Significant  
534 differences of binding are indicated as  $*P < 0.05$ ,  $**P < 0.01$ ,  $***P < 0.001$  and  
535  $****P < 0.0001$  using two-way ANOVA followed by *post hoc* Tukey's multiple  
536 comparison tests. ns, not significant.

537



## 538 **Discussion**

539           We report here that a serum-free and insulin-supplemented culture medium  
540 condition, 1% ITS supplemented RPMI-1640, supports DNFA and DNCS pathway  
541 activation as well as proliferation and survival of human melanoma cell lines. Under  
542 this condition, HT-144 cells proliferate while relying entirely on *de novo* lipid  
543 synthesis to meet lipid requirements. Expression of DNFA and DNCS enzymes  
544 increases significantly in cells when cultured in 1% ITS as compared with other cell  
545 culture conditions. We found that 1% ITS medium activates DNFA and DNCS gene  
546 expression through the transcription regulators SREBP1 and SREBP2, respectively.  
547 In particular, culturing cells in 1% ITS medium promoted the transcription activation  
548 of SREBP1 and accumulation of nuclear SREBP1 protein, as compared with other  
549 medium conditions, and cells cultured in 1% ITS medium exhibited further increased  
550 binding of SREBP1 at a DNFA gene promoter, consistent with high SREBP1-  
551 dependent gene activation under this medium condition.

552           Unlike free fatty acids, free cholesterol and cholesteryl esters are only  
553 minimally soluble in blood and must be transported within lipoproteins (62).  
554 Lipoprotein-deficient serum (LPDS) is thus more efficient in removing cholesterol  
555 and cholesteryl esters than fatty acids. LPDS has been used in lieu of full serum as an  
556 activating medium for SREBPs, because it alleviates sterol inhibition (63). However,  
557 LPDS contains free fatty acids that enter cells through passive membrane diffusion or  
558 active transport through membrane receptors (64). LPDS has therefore also been used  
559 for studies of cellular fatty acid uptake and lipid storage from extracellular fatty acids  
560 (65). By contrast, ITS medium contains no external free fatty acids or lipoproteins.  
561 Membrane lipids for cell proliferation in ITS medium rely exclusively upon DNFA

562 and DNCS. Thus, ITS represents an attractive culture medium as compared with  
563 LPDS for studying DNFA-supported proliferation and cell survival of cancer cells.

564 Our results are consistent with the notion that active DNFA is sufficient for  
565 cell proliferation in some malignant melanoma cell lines but not in others. Lipid  
566 depletion in 0% FBS activated DNFA and DNCS gene expression, possibly due to  
567 removal of exogenous cholesterol, the classic feedback inhibitor of SREBP  
568 processing and lipid synthesis (66). HT-144 cells are able to persist and survive under  
569 these conditions, but become quiescent, likely due to removal of growth factors in the  
570 serum necessary to support active proliferation. HT-144 cells proliferate, still with  
571 elevated DNFA and DNCS expression, in the presence of insulin, the only growth  
572 factor provided by 1% ITS. Similarly, DNFA gene expression was upregulated in  
573 MEL-JUSO cells when cultured in 1% ITS medium, even though MEL-JUSO failed  
574 to proliferate in this condition. This data supports the model where insulin present in  
575 the serum free ITS medium has both metabolic and mitogenic functions in cancer  
576 cells, promoting (with varying efficacy) cell survival and active proliferation. The  
577 entire regulatory regime for DNFA and its role in cell survival, in which insulin  
578 participates when present, is not yet fully clear but may involve the AKT/GSK3  
579 signaling pathway (67, 68). Interestingly, two metastatic melanoma cell lines seem  
580 able to proliferate using only DNFA-derived lipids, whereas the two primary  
581 melanoma cell lines evaluated have either limited or no proliferative capacity when  
582 serum lipids are absent. Our study of four cell lines is too small to yield a conclusion  
583 on DNFA in metastatic vs primary tumors, but at least hints that DNFA and DNCS  
584 are important to tumor malignancy. Regardless, we believe that the 1% ITS medium  
585 could represent a useful tool for a more comprehensive follow-up investigation of the  
586 role of DNFA and DNCS in cancer proliferation and survival.

587 Our data indicate that insulin promotes both SREBP1 processing and  
588 transcription. Nuclear SREBP1 was elevated in cells cultured in 1% ITS and 0% FBS  
589 media, compared to 10% FBS medium. However, cytoplasmic SREBP1 precursor  
590 levels remained similar in both 1% ITS and 10% FBS medium conditions. This could  
591 indicate that SREBP1 precursor levels are maintained regardless of whether a portion  
592 of SREBP1 has been processed and migrated into the nucleus. Combining these  
593 observations with the gene expression data, we believe that insulin also has a  
594 stimulatory effect on *SREBF1* transcription in cancer cells, in agreement with  
595 previous findings from liver studies (22, 38).

596 DNFA is necessary for cell survival even in quiescent cancer cells that do not  
597 need membrane lipid synthesis for proliferation. In those cells, fatty acid oxidation  
598 (FAO) pathway hyperactivity has also been observed (69). DNFA and FAO are  
599 antagonistic lipid metabolism pathways that compose a futile cycle in cancer cells, but  
600 may represent a metabolic adaptation to promote cell survival under adverse (lipid-  
601 depleted) conditions (70). DNFA primarily relies on cytosolic NADPH derived from  
602 the pentose phosphate pathway (PPP) by glucose-6-phosphate dehydrogenase (G6PD),  
603 as well as malic enzyme (ME) and isocitrate dehydrogenase (IDH1), all of which are  
604 direct targets of SREBP1 (71). Cancer cells frequently promote NADPH synthesis to  
605 support production of cellular anti-oxidants (e.g. glutathione) to counter elevated  
606 reactive oxygen species (ROS). These metabolic adaptations together may then  
607 represent a pro-survival mechanism, dependent on SREBP1.

608

## 609 **Conclusions**

610 In summary, we have identified and validated a serum-free and insulin  
611 supplemented (ITS) medium condition that is well suited for controlled study of  
612 lipogenic gene activation and its mechanism of action in melanomas, and perhaps  
613 other cancer cell types.

614

## 615 **Author Contributions**

616 Conceived and designed the experiments: SW and AMN. Performed the experiments:  
617 SW. Analyzed the data: SW and AMN. Wrote the paper: SW and AMN.

618

## 619 **References**

- 620 1. Hanahan D, Weinberg RA. Hallmarks of cancer: the next generation. *Cell*.  
621 2011;144(5):646-74.
- 622 2. Tisdale MJ. Cancer cachexia: metabolic alterations and clinical manifestations.  
623 *Nutrition*. 1997;13(1):1-7.
- 624 3. Menendez JA, Lupu R. Fatty acid synthase and the lipogenic phenotype in  
625 cancer pathogenesis. *Nat Rev Cancer*. 2007;7(10):763-77.
- 626 4. Font-Burgada J, Sun B, Karin M. Obesity and Cancer: The Oil that Feeds the  
627 Flame. *Cell Metab*. 2016;23(1):48-62.
- 628 5. Iritani N. Nutritional and hormonal regulation of lipogenic-enzyme gene  
629 expression in rat liver. *Eur J Biochem*. 1992;205(2):433-42.

- 630 6. Brown MS, Goldstein JL. The SREBP pathway: regulation of cholesterol  
631 metabolism by proteolysis of a membrane-bound transcription factor. *Cell*.  
632 1997;89(3):331-40.
- 633 7. Giles PM, Andrews BJ, Cheshire J, Noble N, Muller DP, Slack J, et al. Effects  
634 of delipidated serum and lipoprotein-deficient serum on sterol biosynthesis and efflux  
635 in cultured skin fibroblasts - a comparison of the behaviour of cells from a control  
636 with those from a heterozygote and homozygote for familial hypercholesterolaemia.  
637 *Clinica chimica acta; international journal of clinical chemistry*. 1981;113(2):183-91.
- 638 8. Spector AA. Plasma free fatty acid and lipoproteins as sources of  
639 polyunsaturated fatty acid for the brain. *J Mol Neurosci*. 2001;16(2-3):159-65;  
640 discussion 215-21.
- 641 9. Spector AA. Plasma lipid transport. *Clin Physiol Biochem*. 1984;2(2-3):123-  
642 34.
- 643 10. Hamilton JA. Fast flip-flop of cholesterol and fatty acids in membranes:  
644 implications for membrane transport proteins. *Current opinion in lipidology*.  
645 2003;14(3):263-71.
- 646 11. Glatz JF, Luiken JJ, Bonen A. Membrane fatty acid transporters as regulators  
647 of lipid metabolism: implications for metabolic disease. *Physiol Rev*. 2010;90(1):367-  
648 417.
- 649 12. Brown MS, Goldstein JL. A receptor-mediated pathway for cholesterol  
650 homeostasis. *Science*. 1986;232(4746):34-47.
- 651 13. Jump DB. Fatty acid regulation of hepatic lipid metabolism. *Curr Opin Clin*  
652 *Nutr Metab Care*. 2011;14(2):115-20.
- 653 14. Xu J, Nakamura MT, Cho HP, Clarke SD. Sterol regulatory element binding  
654 protein-1 expression is suppressed by dietary polyunsaturated fatty acids. *A*

655 mechanism for the coordinate suppression of lipogenic genes by polyunsaturated fats.

656 J Biol Chem. 1999;274(33):23577-83.

657 15. Ntambi JM, Bene H. Polyunsaturated fatty acid regulation of gene expression.

658 J Mol Neurosci. 2001;16(2-3):273-8; discussion 9-84.

659 16. Landschulz KT, Jump DB, MacDougald OA, Lane MD. Transcriptional

660 control of the stearoyl-CoA desaturase-1 gene by polyunsaturated fatty acids.

661 Biochem Biophys Res Commun. 1994;200(2):763-8.

662 17. Poumay Y, Ronveaux-Dupal MF. Rapid preparative isolation of concentrated

663 low density lipoproteins and of lipoprotein-deficient serum using vertical rotor

664 gradient ultracentrifugation. Journal of lipid research. 1985;26(12):1476-80.

665 18. Ferraz TP, Fiuza MC, Dos Santos ML, Pontes De Carvalho L, Soares NM.

666 Comparison of six methods for the extraction of lipids from serum in terms of

667 effectiveness and protein preservation. J Biochem Biophys Methods. 2004;58(3):187-

668 93.

669 19. Capriotti A, Laposata M. Identification of variables critical to reproducible

670 delipidation of serum. Journal of Tissue Culture Methods. 1986;10(4):219-21.

671 20. Cham BE, Knowles BR. A solvent system for delipidation of plasma or serum

672 without protein precipitation. Journal of lipid research. 1976;17(2):176-81.

673 21. Moore GE, Gerner RE, Franklin HA. Culture of normal human leukocytes.

674 JAMA. 1967;199(8):519-24.

675 22. Foretz M, Pacot C, Dugail I, Lemarchand P, Guichard C, Le Liepvre X, et al.

676 ADD1/SREBP-1c is required in the activation of hepatic lipogenic gene expression by

677 glucose. Mol Cell Biol. 1999;19(5):3760-8.

- 678 23. Foufelle F, Gouhot B, Pegorier JP, Perdereau D, Girard J, Ferre P. Glucose  
679 stimulation of lipogenic enzyme gene expression in cultured white adipose tissue. A  
680 role for glucose 6-phosphate. *J Biol Chem.* 1992;267(29):20543-6.
- 681 24. Martin DB, Vagelos PR. The mechanism of tricarboxylic acid cycle regulation  
682 of fatty acid synthesis. *J Biol Chem.* 1962;237:1787-92.
- 683 25. Rui L. Energy metabolism in the liver. *Compr Physiol.* 2014;4(1):177-97.
- 684 26. Waite M, Wakil SJ. Studies on the mechanism of fatty acid synthesis. XII.  
685 Acetyl coenzyme A carboxylase. *J Biol Chem.* 1962;237:2750-7.
- 686 27. Kallen RG, Lowenstein JM. The stimulation of fatty acid synthesis by  
687 isocitrate and malonate. *Arch Biochem Biophys.* 1962;96:188-90.
- 688 28. Geelen MJ, Schmitz MG. The role of citrate in the regulation of hepatic fatty  
689 acid synthesis by insulin and glucagon. *Horm Metab Res.* 1993;25(10):525-7.
- 690 29. Warburg O. On the origin of cancer cells. *Science.* 1956;123(3191):309-14.
- 691 30. Crabtree HG. Observations on the carbohydrate metabolism of tumours.  
692 *Biochem J.* 1929;23(3):536-45.
- 693 31. Liberti MV, Locasale JW. The Warburg Effect: How Does it Benefit Cancer  
694 Cells? *Trends Biochem Sci.* 2016;41(3):211-8.
- 695 32. Vander Heiden MG, Cantley LC, Thompson CB. Understanding the Warburg  
696 effect: the metabolic requirements of cell proliferation. *Science.*  
697 2009;324(5930):1029-33.
- 698 33. Han J, Zhang L, Guo H, Wysham WZ, Roque DR, Willson AK, et al. Glucose  
699 promotes cell proliferation, glucose uptake and invasion in endometrial cancer cells  
700 via AMPK/mTOR/S6 and MAPK signaling. *Gynecol Oncol.* 2015;138(3):668-75.
- 701 34. Chua KH, Aminuddin BS, Fuzina NH, Ruszymah BH. Insulin-transferrin-  
702 selenium prevent human chondrocyte dedifferentiation and promote the formation of

703 high quality tissue engineered human hyaline cartilage. *Eur Cell Mater.* 2005;9:58-67;  
704 discussion

705 35. Fang B, Song YP, Liao LM, Han Q, Zhao RC. Treatment of severe therapy-  
706 resistant acute graft-versus-host disease with human adipose tissue-derived  
707 mesenchymal stem cells. *Bone Marrow Transplant.* 2006;38(5):389-90.

708 36. Barnes D, Sato G. Serum-free cell culture: a unifying approach. *Cell.*  
709 1980;22(3):649-55.

710 37. McKeehan WL, Adams PS, Rosser MP. Direct mitogenic effects of insulin,  
711 epidermal growth factor, glucocorticoid, cholera toxin, unknown pituitary factors and  
712 possibly prolactin, but not androgen, on normal rat prostate epithelial cells in serum-  
713 free, primary cell culture. *Cancer Res.* 1984;44(5):1998-2010.

714 38. Shimomura I, Bashmakov Y, Ikemoto S, Horton JD, Brown MS, Goldstein JL.  
715 Insulin selectively increases SREBP-1c mRNA in the livers of rats with  
716 streptozotocin-induced diabetes. *Proc Natl Acad Sci U S A.* 1999;96(24):13656-61.

717 39. Luck AN, Mason AB. Transferrin-mediated cellular iron delivery. *Curr Top*  
718 *Membr.* 2012;69:3-35.

719 40. De Domenico I, McVey Ward D, Kaplan J. Regulation of iron acquisition and  
720 storage: consequences for iron-linked disorders. *Nat Rev Mol Cell Biol.* 2008;9(1):72-  
721 81.

722 41. Laskey J, Webb I, Schulman HM, Ponka P. Evidence that transferrin supports  
723 cell proliferation by supplying iron for DNA synthesis. *Exp Cell Res.* 1988;176(1):87-  
724 95.

725 42. Tinggi U. Selenium: its role as antioxidant in human health. *Environ Health*  
726 *Prev Med.* 2008;13(2):102-8.



- 727 43. Brower M, Carney DN, Oie HK, Gazdar AF, Minna JD. Growth of cell lines  
728 and clinical specimens of human non-small cell lung cancer in a serum-free defined  
729 medium. *Cancer Res.* 1986;46(2):798-806.
- 730 44. Mosch B, Pietzsch D, Pietzsch J. Irradiation affects cellular properties and Eph  
731 receptor expression in human melanoma cells. *Cell Adh Migr.* 2012;6(2):113-25.
- 732 45. Ziegler-Heitbrock HW, Munker R, Johnson J, Petersmann I, Schmoeckel C,  
733 Riethmuller G. In vitro differentiation of human melanoma cells analyzed with  
734 monoclonal antibodies. *Cancer Res.* 1985;45(3):1344-50.
- 735 46. Murray LB, Lau YK, Yu Q. Merlin is a negative regulator of human  
736 melanoma growth. *PLoS One.* 2012;7(8):e43295.
- 737 47. Satyamoorthy K, DeJesus E, Linnenbach AJ, Kraj B, Kornreich DL, Rendle S,  
738 et al. Melanoma cell lines from different stages of progression and their biological and  
739 molecular analyses. *Melanoma research.* 1997;7 Suppl 2:S35-42.
- 740 48. Fogh J, Fogh JM, Orfeo T. One hundred and twenty-seven cultured human  
741 tumor cell lines producing tumors in nude mice. *Journal of the National Cancer*  
742 *Institute.* 1977;59(1):221-6.
- 743 49. Fogh J. *Human tumor cells in vitro.* New York: Plenum Press; 1975. xix, 557  
744 p. p.
- 745 50. Fok JY, Ekmekcioglu S, Mehta K. Implications of tissue transglutaminase  
746 expression in malignant melanoma. *Molecular cancer therapeutics.* 2006;5(6):1493-  
747 503.
- 748 51. Giard DJ, Aaronson SA, Todaro GJ, Arnstein P, Kersey JH, Dosik H, et al. In  
749 vitro cultivation of human tumors: establishment of cell lines derived from a series of  
750 solid tumors. *Journal of the National Cancer Institute.* 1973;51(5):1417-23.

- 751 52. Johnson JP, Demmer-Dieckmann M, Meo T, Hadam MR, Riethmuller G.  
752 Surface antigens of human melanoma cells defined by monoclonal antibodies. I.  
753 Biochemical characterization of two antigens found on cell lines and fresh tumors of  
754 diverse tissue origin. *Eur J Immunol.* 1981;11(10):825-31.
- 755 53. Prabst K, Engelhardt H, Ringgeler S, Hubner H. Basic Colorimetric  
756 Proliferation Assays: MTT, WST, and Resazurin. *Methods Mol Biol.* 2017;1601:1-17.
- 757 54. Rampersad SN. Multiple applications of Alamar Blue as an indicator of  
758 metabolic function and cellular health in cell viability bioassays. *Sensors (Basel).*  
759 2012;12(9):12347-60.
- 760 55. Quent VM, Loessner D, Friis T, Reichert JC, Hutmacher DW. Discrepancies  
761 between metabolic activity and DNA content as tool to assess cell proliferation in  
762 cancer research. *J Cell Mol Med.* 2010;14(4):1003-13.
- 763 56. Amemiya-Kudo M, Shimano H, Yoshikawa T, Yahagi N, Hasty AH, Okazaki  
764 H, et al. Promoter analysis of the mouse sterol regulatory element-binding protein-1c  
765 gene. *J Biol Chem.* 2000;275(40):31078-85.
- 766 57. Horton JD, Goldstein JL, Brown MS. SREBPs: activators of the complete  
767 program of cholesterol and fatty acid synthesis in the liver. *J Clin Invest.*  
768 2002;109(9):1125-31.
- 769 58. Oliner JD, Andresen JM, Hansen SK, Zhou S, Tjian R. SREBP transcriptional  
770 activity is mediated through an interaction with the CREB-binding protein. *Genes*  
771 *Dev.* 1996;10(22):2903-11.
- 772 59. Ericsson J, Edwards PA. CBP is required for sterol-regulated and sterol  
773 regulatory element-binding protein-regulated transcription. *J Biol Chem.*  
774 1998;273(28):17865-70.

- 775 60. Creighton MP, Cheng AW, Welstead GG, Kooistra T, Carey BW, Steine EJ,  
776 et al. Histone H3K27ac separates active from poised enhancers and predicts  
777 developmental state. *Proc Natl Acad Sci U S A*. 2010;107(50):21931-6.
- 778 61. Wu S, Naar A. Elevated de novo fatty acid biosynthesis gene expression  
779 promotes melanoma cell survival and drug resistance. *bioRxiv*.  
780 2018(10.1101/441303).
- 781 62. Cox RA, Garcia-Palmieri MR. Cholesterol, Triglycerides, and Associated  
782 Lipoproteins. In: rd, Walker HK, Hall WD, Hurst JW, editors. *Clinical Methods: The*  
783 *History, Physical, and Laboratory Examinations*. Boston1990.
- 784 63. Yang T, Espenshade PJ, Wright ME, Yabe D, Gong Y, Aebersold R, et al.  
785 Crucial step in cholesterol homeostasis: sterols promote binding of SCAP to INSIG-1,  
786 a membrane protein that facilitates retention of SREBPs in ER. *Cell*.  
787 2002;110(4):489-500.
- 788 64. Pepino MY, Kuda O, Samovski D, Abumrad NA. Structure-function of CD36  
789 and importance of fatty acid signal transduction in fat metabolism. *Annual review of*  
790 *nutrition*. 2014;34:281-303.
- 791 65. Bensaad K, Favaro E, Lewis CA, Peck B, Lord S, Collins JM, et al. Fatty acid  
792 uptake and lipid storage induced by HIF-1alpha contribute to cell growth and survival  
793 after hypoxia-reoxygenation. *Cell Rep*. 2014;9(1):349-65.
- 794 66. Goldstein JL, Brown MS. A century of cholesterol and coronaries: from  
795 plaques to genes to statins. *Cell*. 2015;161(1):161-72.
- 796 67. Shao W, Espenshade PJ. Expanding roles for SREBP in metabolism. *Cell*  
797 *Metab*. 2012;16(4):414-9.

- 798 68. Kim KH, Song MJ, Yoo EJ, Choe SS, Park SD, Kim JB. Regulatory role of  
799 glycogen synthase kinase 3 for transcriptional activity of ADD1/SREBP1c. *J Biol*  
800 *Chem.* 2004;279(50):51999-2006.
- 801 69. Carracedo A, Cantley LC, Pandolfi PP. Cancer metabolism: fatty acid  
802 oxidation in the limelight. *Nat Rev Cancer.* 2013;13(4):227-32.
- 803 70. Qian H, Beard DA. Metabolic futile cycles and their functions: a systems  
804 analysis of energy and control. *Syst Biol (Stevenage).* 2006;153(4):192-200.
- 805 71. Shimano H, Yahagi N, Amemiya-Kudo M, Hasty AH, Osuga J, Tamura Y, et  
806 al. Sterol regulatory element-binding protein-1 as a key transcription factor for  
807 nutritional induction of lipogenic enzyme genes. *J Biol Chem.* 1999;274(50):35832-9.  
808

## 809 **Supporting information**

### 810 **S1 Fig. A lipid-free and insulin-supplemented medium supports** 811 **proliferation of A375 and WM1552C, but not MEL-JUSO cell lines.**

812 (A – C) A375, WM1552C and MEL-JUSO cell lines were seeded in 10% FBS  
813 medium at day zero. On day one, cells were washed with PBS and transferred to the  
814 indicated medium conditions. Cell proliferation was measured with alamarBlue assay  
815 daily. Each data point represents the mean  $\pm$ SD of quadruplicate samples. The results  
816 were analyzed using two-way repeated measures ANOVA followed by *post hoc*  
817 Tukey's multiple comparison tests. (A) A375 cells: for culture time,  $F = 865.8$ ,  $P <$   
818  $0.0001$ ; for culture condition,  $F = 282.8$ ,  $P < 0.0001$ ; for interaction between culture  
819 time and condition,  $F = 278.7$ ,  $P < 0.0001$ . (B) WM1552C cells: for culture time,  $F =$   
820  $351.1$ ,  $P < 0.0001$ ; for culture condition,  $F = 172.8$ ,  $P < 0.0001$ ; for interaction  
821 between culture time and condition,  $F = 137.4$ ,  $P < 0.0001$ . (C) MEL-JUSO cells: for

822 culture time,  $F = 501.6$ ,  $P < 0.0001$ ; for culture condition,  $F = 475.9$ ,  $P < 0.0001$ ; for  
823 interaction between culture time and condition,  $F = 584.5$ ,  $P < 0.0001$ . (D – F) A375,  
824 WM1552C and MEL-JUSO cells were seeded in 10% FBS medium at day zero. On  
825 day one, cells were washed with PBS and changed to the indicated medium conditions.  
826 alamarBlue assay was performed on the cells cultured in the indicated medium for  
827 one hour. Results were analyzed using one-way ANOVA followed by *post hoc*  
828 Tukey's multiple comparison tests. (D) A375 cells,  $F = 13.24$ ,  $P = 0.0003$ . (E)  
829 WM1552C cells,  $F = 17.31$ ,  $P < 0.0001$ . (F) MEL-JUSO cells,  $F = 6.985$ ,  $P = 0.0061$ .  
830 Significant differences between medium conditions are indicated as \* $P < 0.05$ , \*\* $P <$   
831  $0.01$ , \*\*\* $P < 0.001$  and \*\*\*\* $P < 0.0001$ . ns, not significant. (G – I) A375, WM1552C  
832 and MEL-JUSO cell lines were seeded in 10% FBS medium at day zero. On day one,  
833 cells were cultured in the indicated medium conditions. CyQuant assays were  
834 performed on the cells cultured in the indicated medium at day six. Each data bar  
835 represents average measurement of five replicate samples. Results were analyzed  
836 using one-way ANOVA followed by *post hoc* Tukey's multiple comparison tests. (G)  
837 A375 cells,  $F = 51.01$ ,  $P < 0.0001$ . (H) WM1552C cells,  $F = 60.11$ ,  $P < 0.0001$ . (I)  
838 MEL-JUSO cells,  $F = 96.82$ ,  $P < 0.0001$ . Significant differences between medium  
839 conditions are indicated as \* $P < 0.05$ , \*\* $P < 0.01$ , \*\*\* $P < 0.001$  and \*\*\*\* $P < 0.0001$ .  
840 ns, not significant.

841

842 **S2 Fig. A lipid-free and insulin-supplemented medium supports long-**  
843 **term proliferation of melanoma cell lines A375, WM1552C but not**  
844 **MEL-JUSO.**

845 (A, F, K) A375, WM1552C and MEL-JUSO cell lines were routinely maintained in  
846 RPMI medium with 10% FBS. Morphologies of cells were recorded by light

847 microscopy. (B-E) Morphologies of A375 cells cultured in 1% ITS medium from  
848 passage one (P1) to passage six (P6) over the course of six weeks were monitored by  
849 light microscopy. (G-J) Morphologies of WM1552C cells cultured in 1% ITS medium  
850 from passage one (P1) to passage four (P4) over the course of six weeks were  
851 monitored by light microscopy. (L-M) Morphologies of MEL-JUSO cells cultured in  
852 1% ITS medium from passage one (P1) to passage two (P2). MEL-JUSO cells failed  
853 to proliferate in 1% ITS medium and could not be passaged. Morphologies of live  
854 cells were recorded by light microscopy with 40 × objective and 10 × ocular lens.

855

856 **S3 Fig. Lipid depletion combined with insulin supplement yields**  
857 **increased expression of lipogenic genes in MEL-JUSO cells.**

858 (A-K) The expression level of DNFA and DNCS genes was analyzed by RT-qPCR  
859 assay. MEL-JUSO cells were cultured in 10%, 0% FBS or 1% ITS medium for 24  
860 hours. Significant differences between medium conditions are indicated as \* $P < 0.05$ ,  
861 \*\* $P < 0.01$ , \*\*\* $P < 0.001$  and \*\*\*\* $P < 0.0001$  using one-way ANOVA followed by  
862 *post hoc* Tukey's multiple comparison tests. ns, not significant. Each data point  
863 represents the mean  $\pm$ SD of results from quadruplicate samples.

864

**Figure 1**

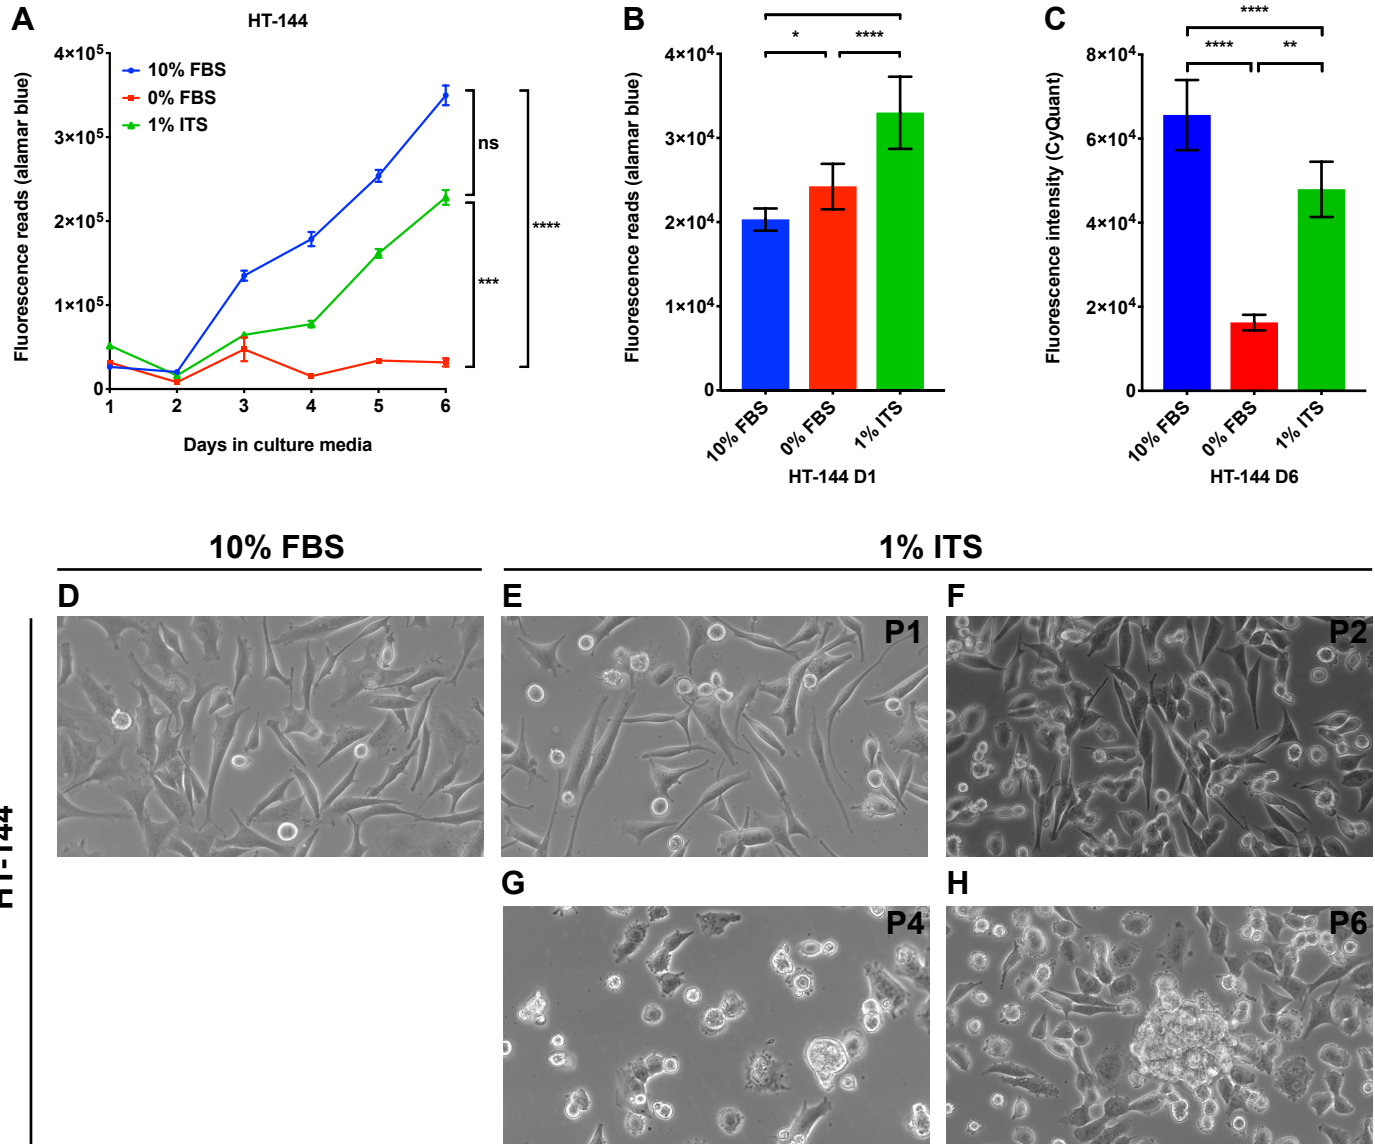

**Figure 2**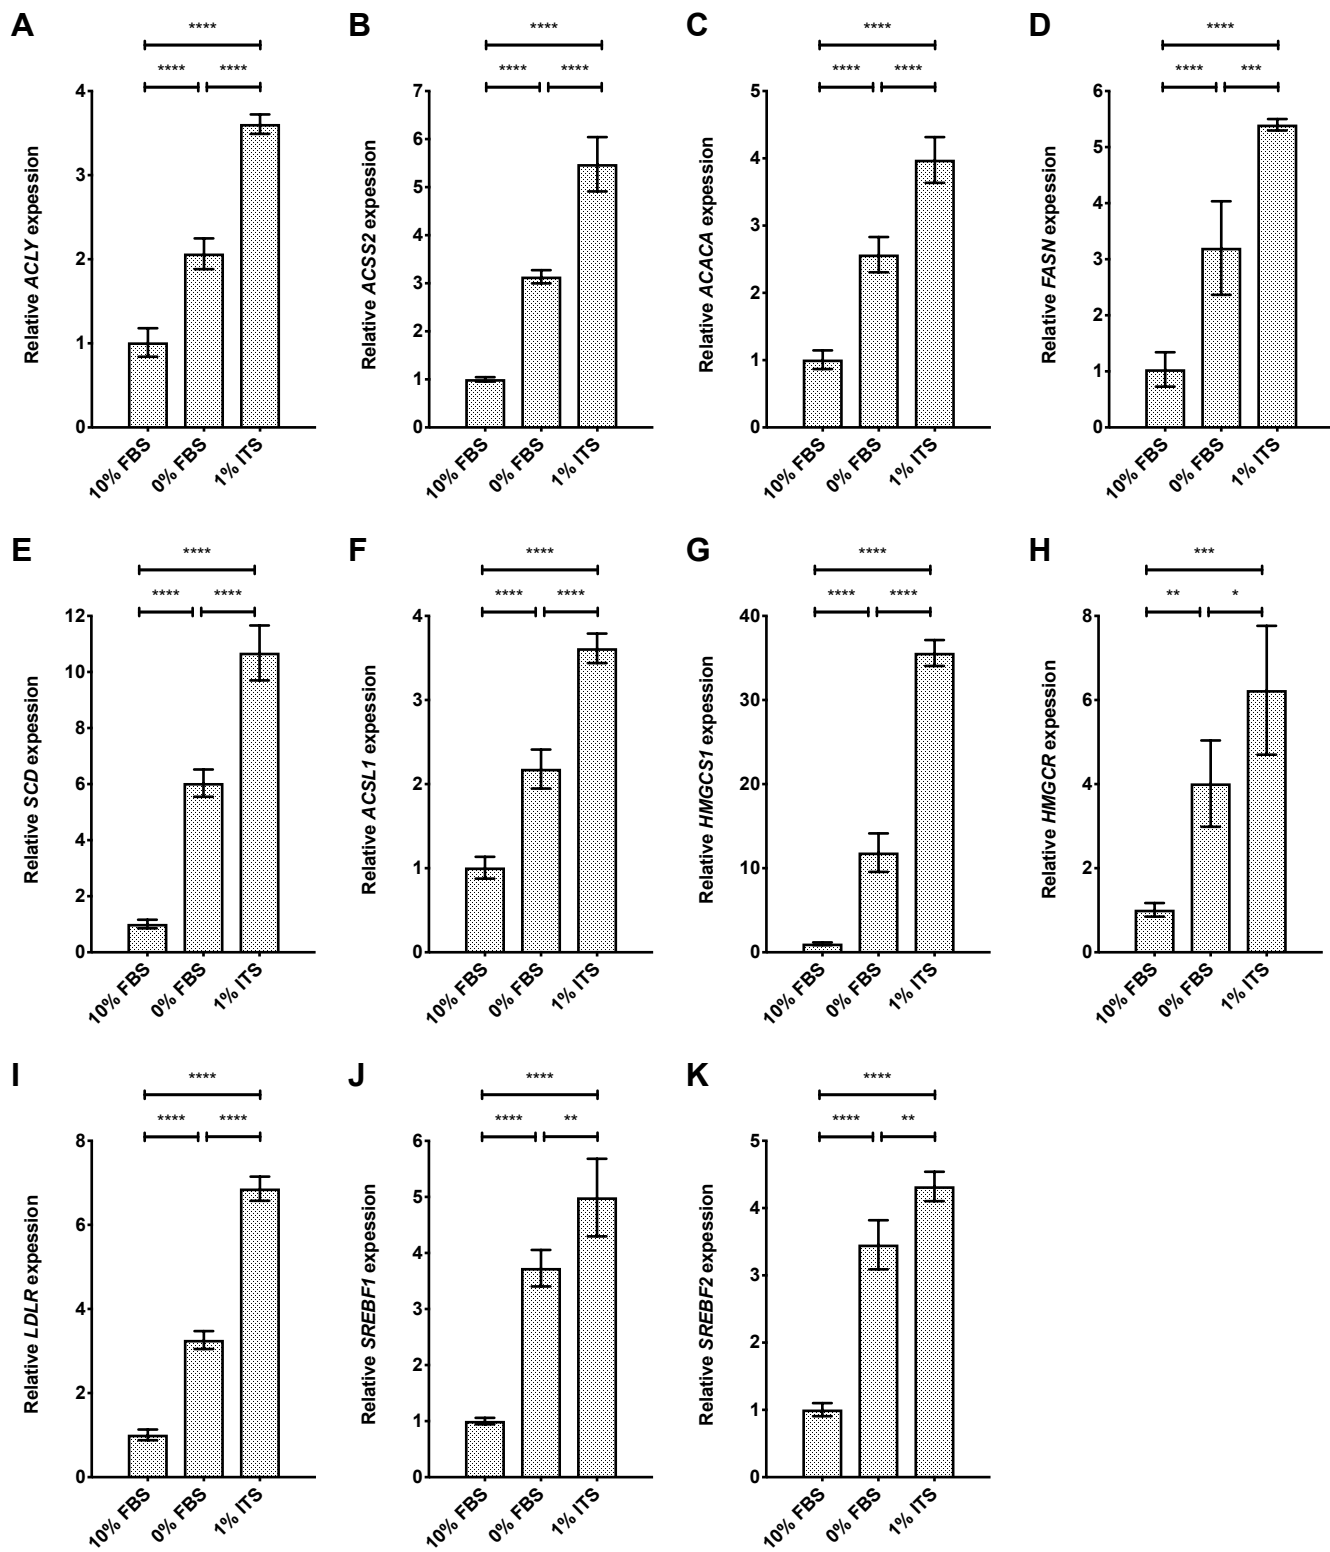



**Figure 3**

**A**

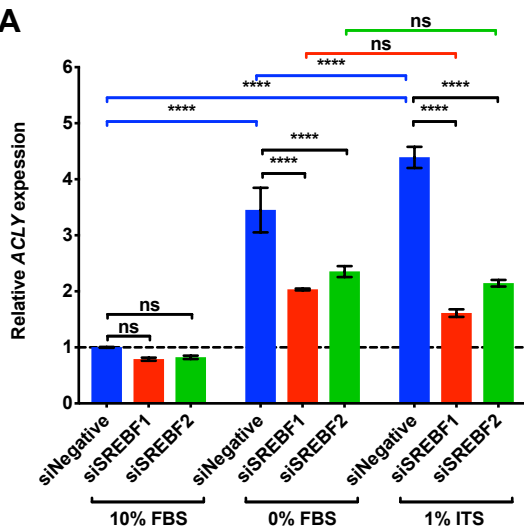

**B**

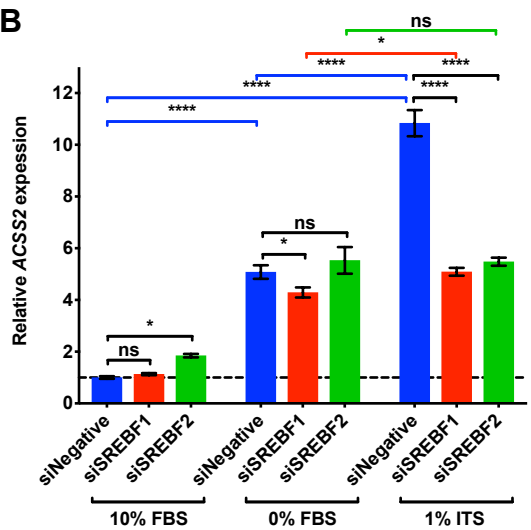

**C**

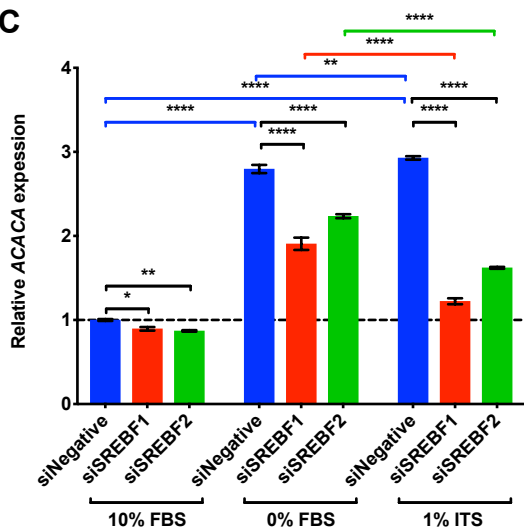

**D**

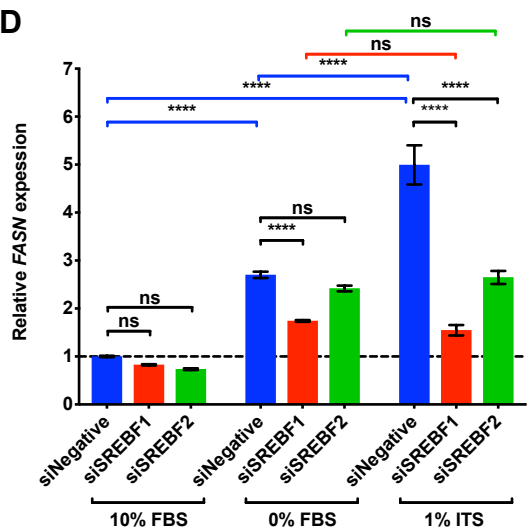

**E**

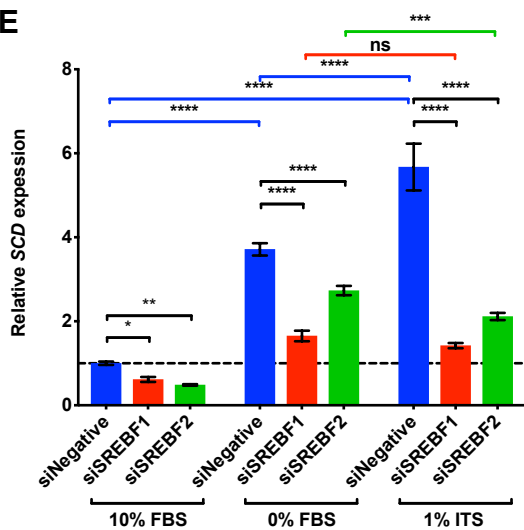

**F**

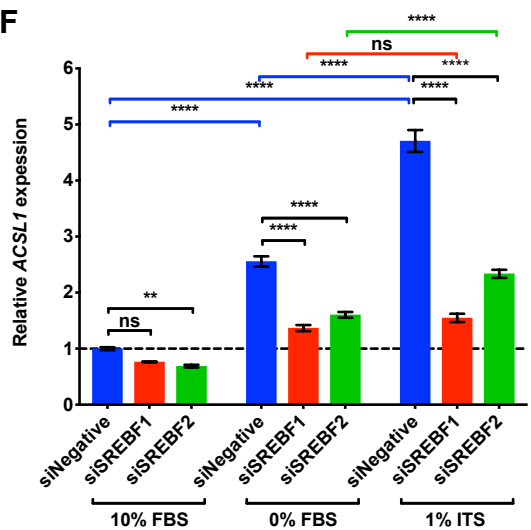

**Figure 4**

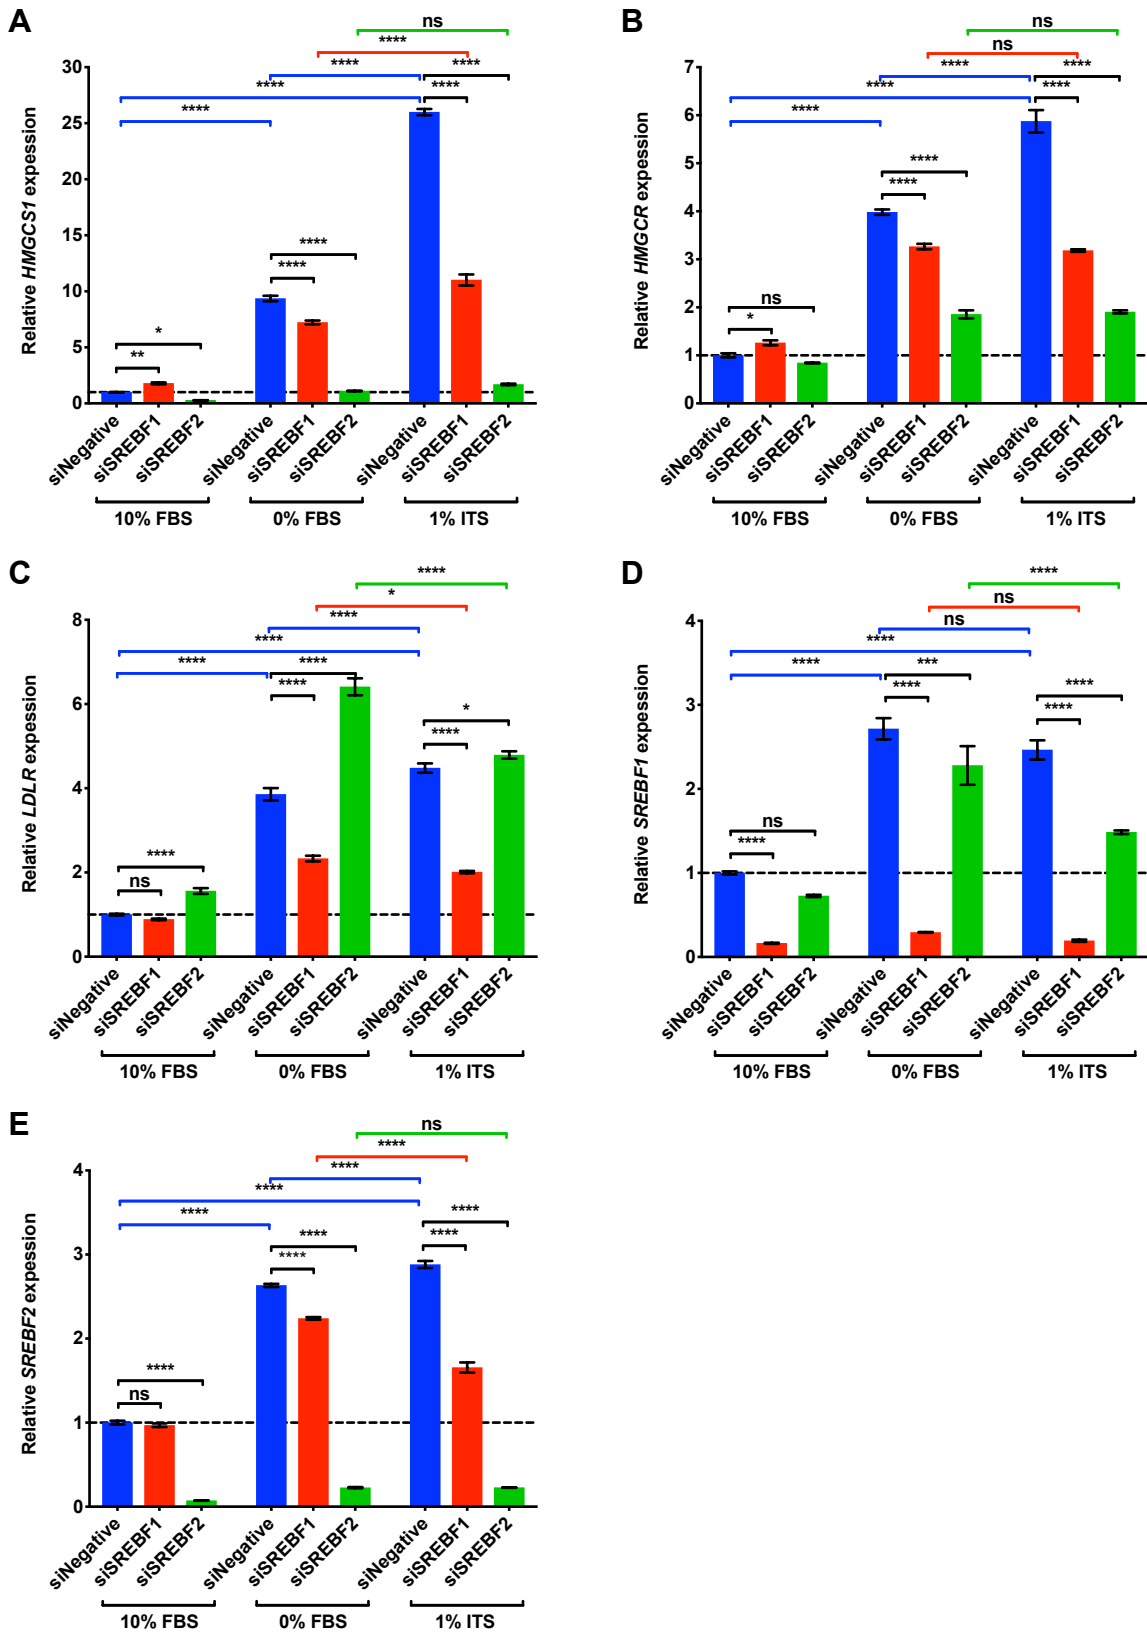

**Figure 5**

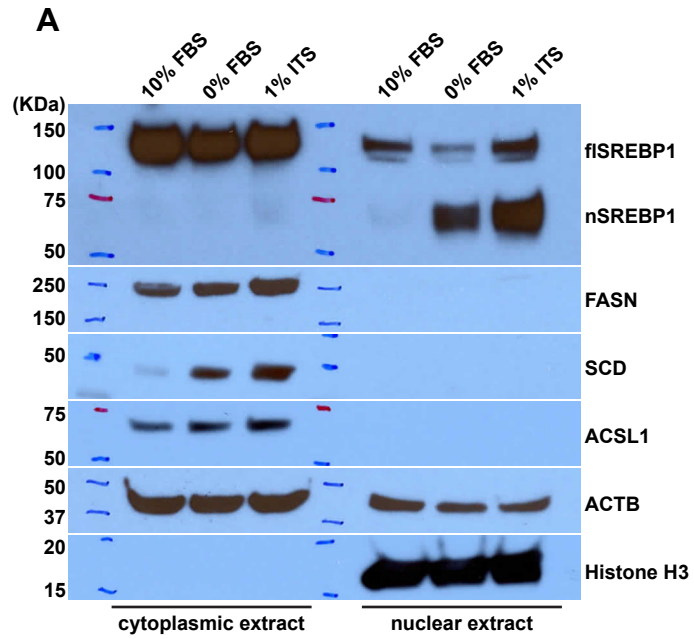

**Figure 6**

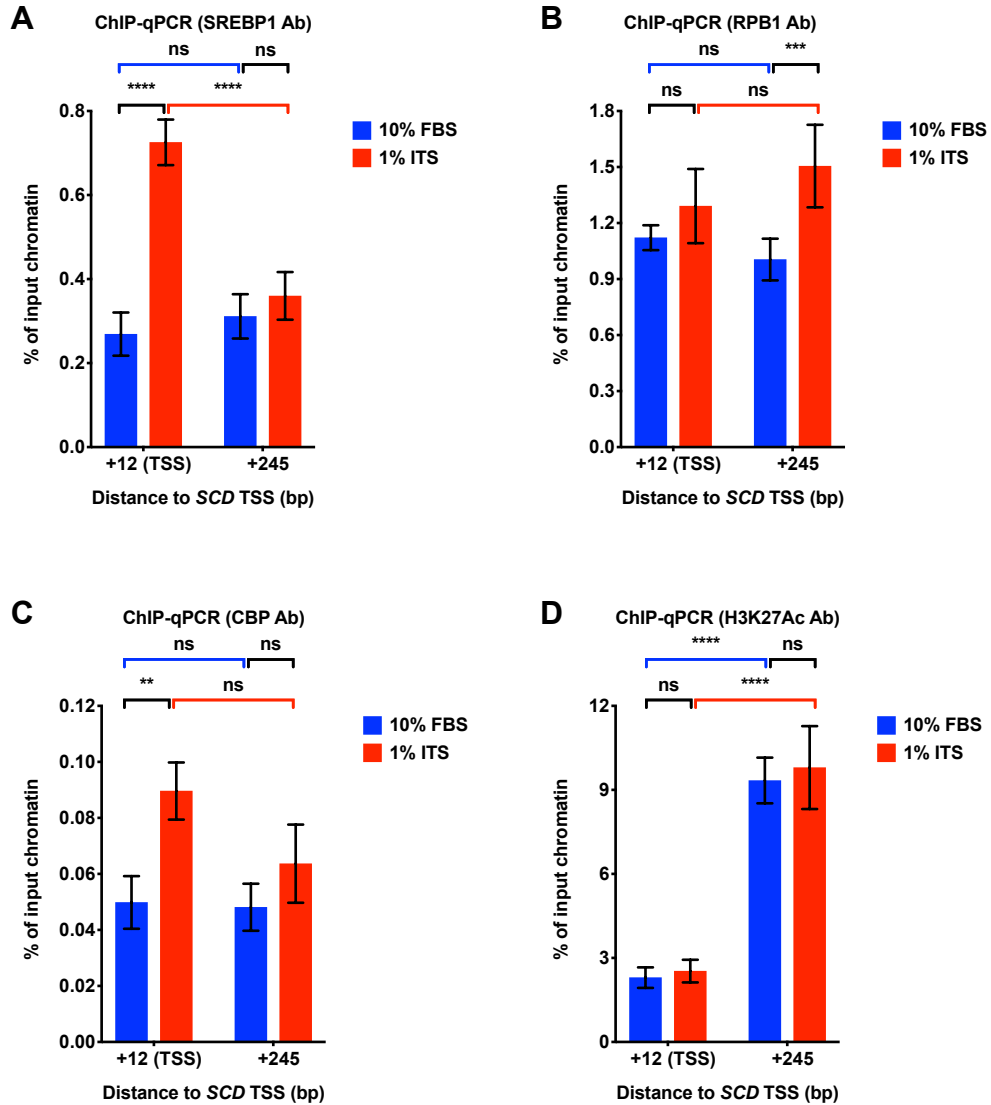

# S1 Figure

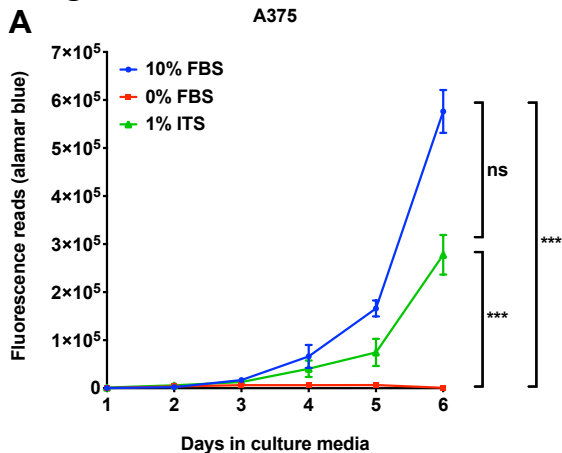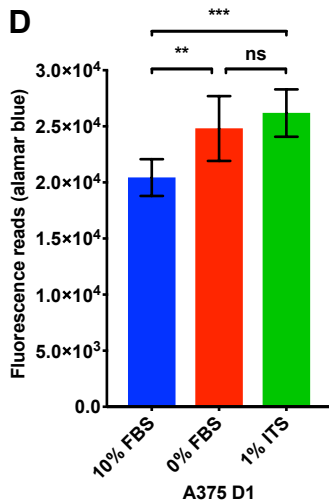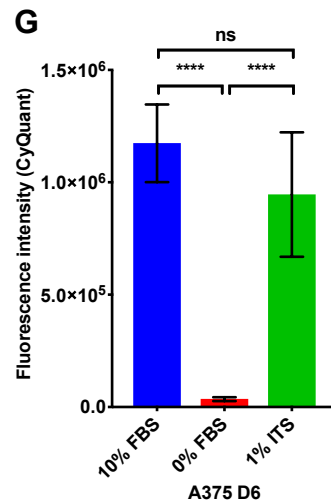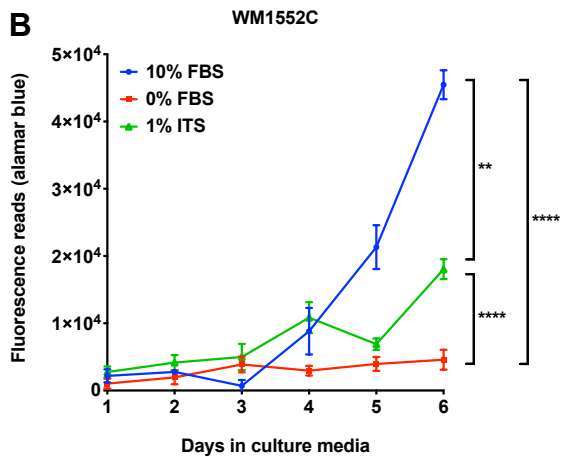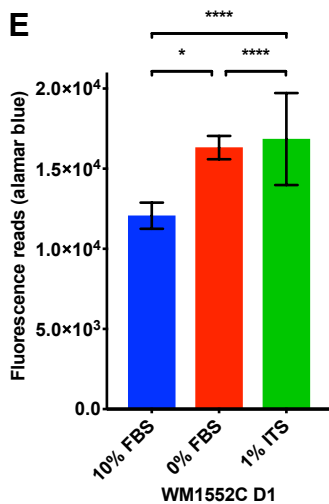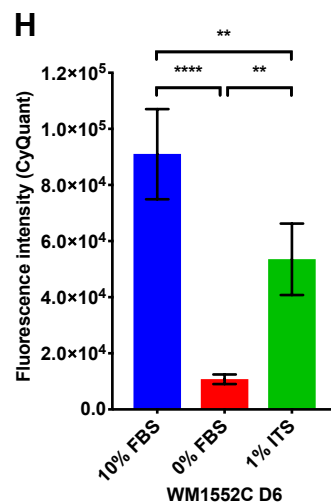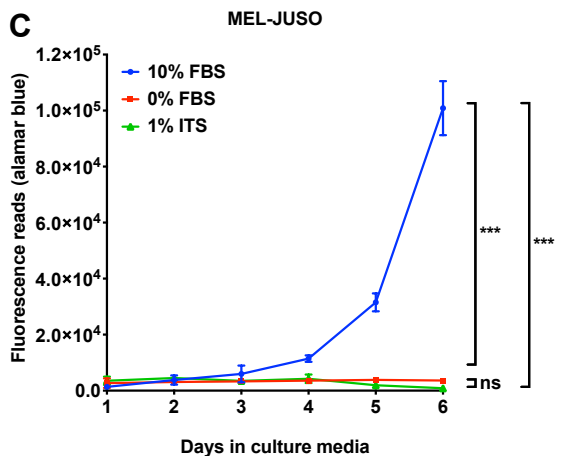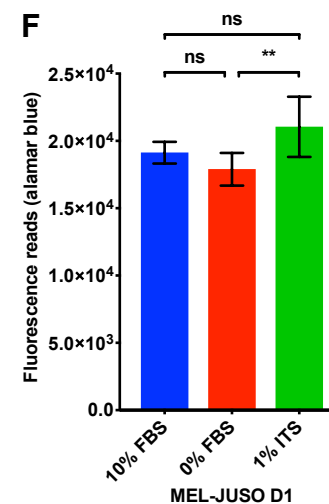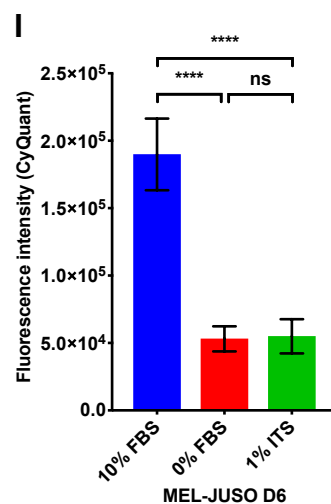

S2 Figure

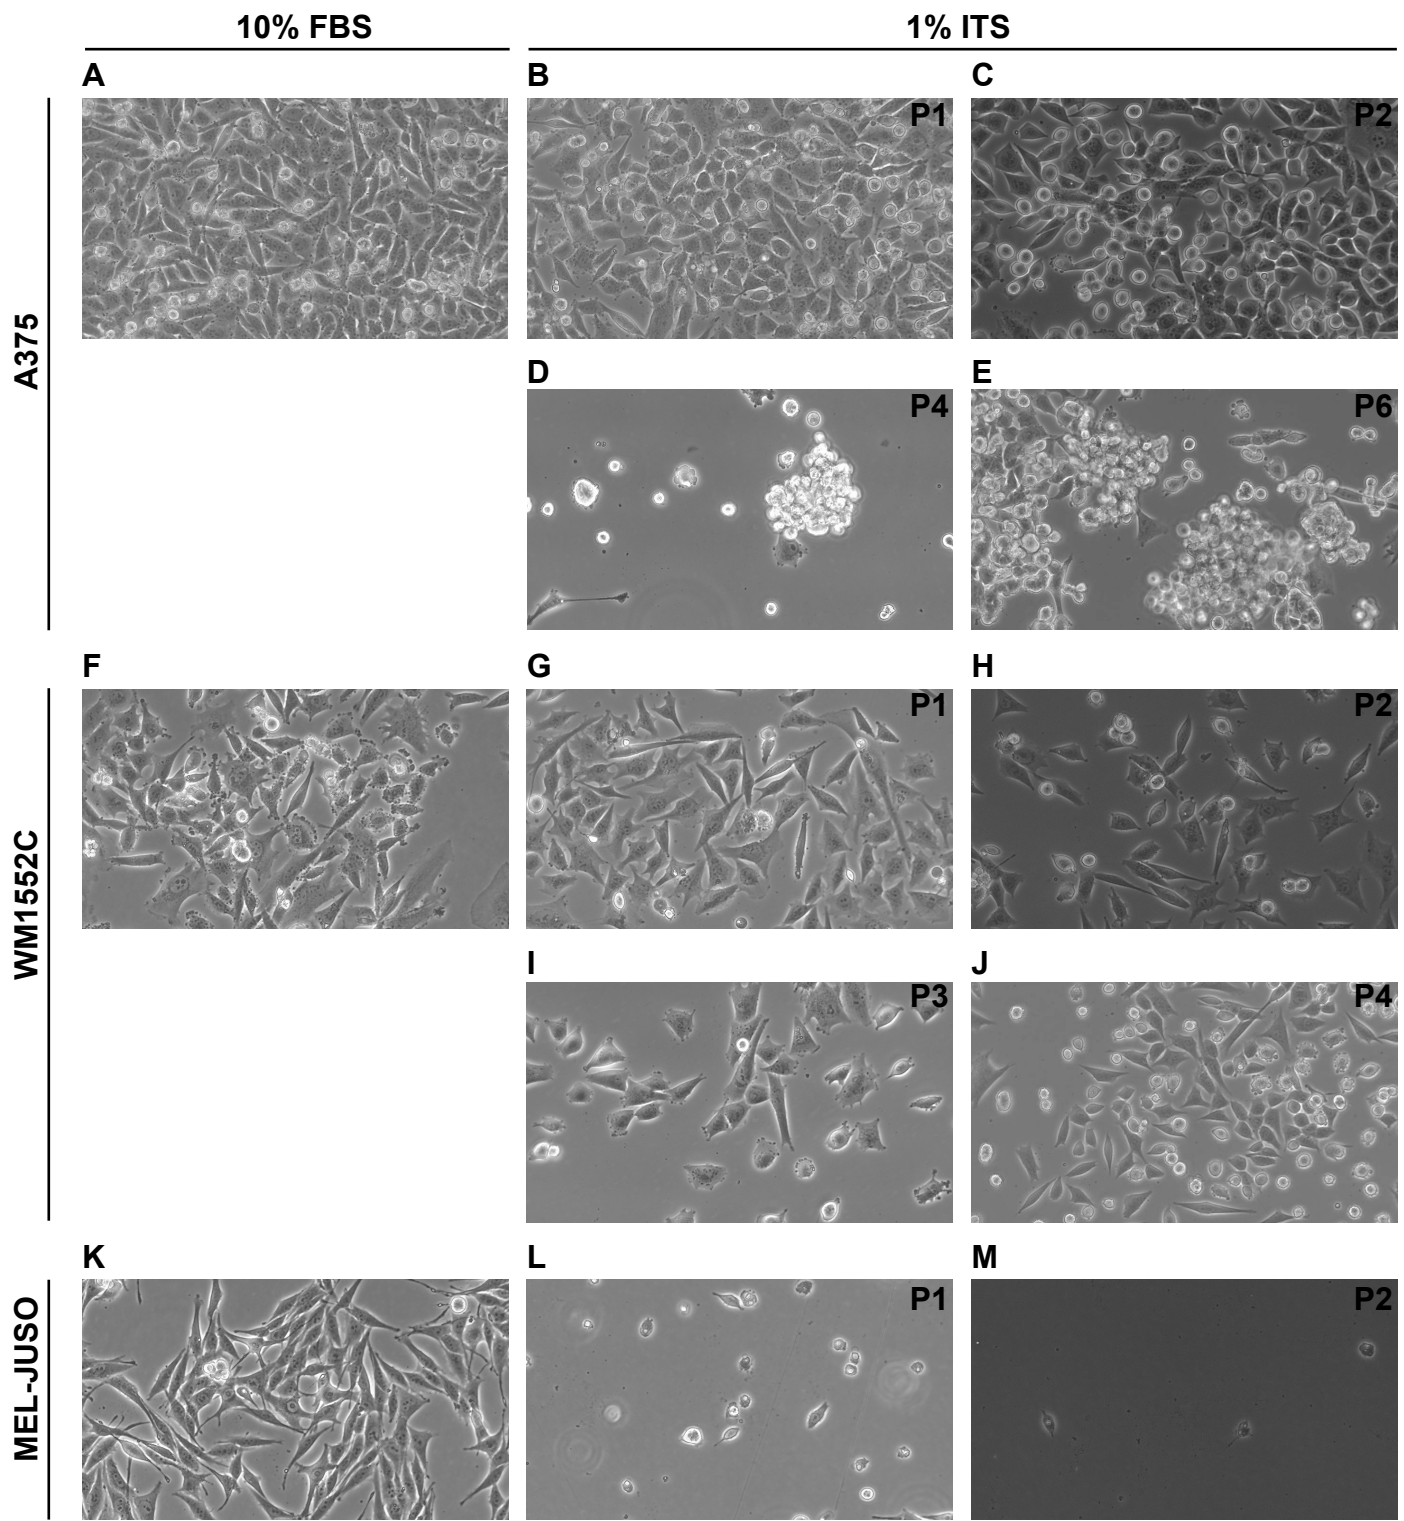

# S3 Figure

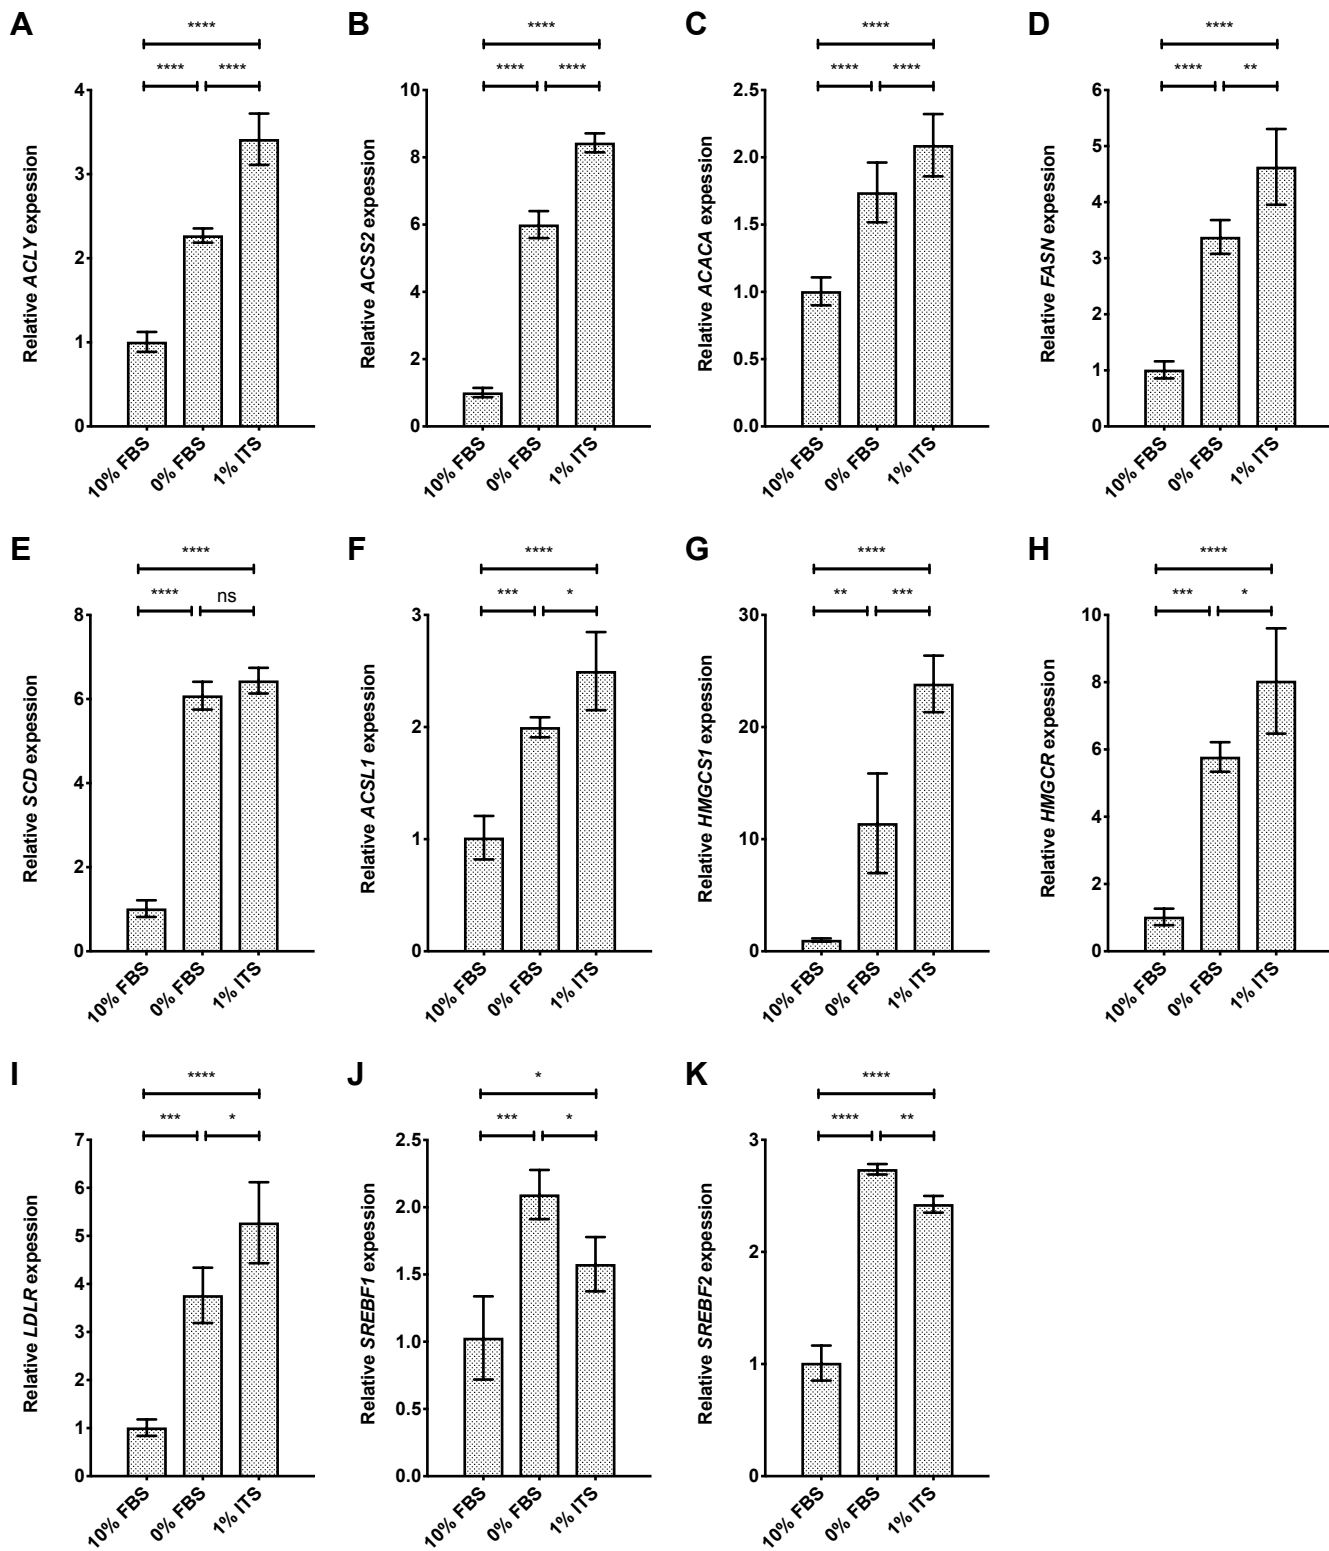

Source: http://biorxiv.org/content/10.1101/479964v2.full.pdf
